## 1 **Vaccinia E5 is a major inhibitor of the DNA sensor cGAS**

2 Ning Yang<sup>1\*</sup>, Yi Wang<sup>1</sup>, Peihong Dai<sup>1</sup>, Tuo Li<sup>2</sup>, Christian Zierhut<sup>3,4</sup>, Adrian Tan<sup>5</sup>, Tuo Zhang<sup>5</sup>,  
3 Heng Pan<sup>6</sup>, Zhuoning Li<sup>6</sup>, Alban Ordureau<sup>7</sup>, Jenny Zhaoying Xiang<sup>5</sup>, Ronald C. Hendrickson<sup>6</sup>,  
4 Hironori Funabiki<sup>3</sup>, Zhijian Chen<sup>2</sup>, and Liang Deng<sup>1,8\*#</sup>

5 <sup>1</sup>Dermatology Service, Department of Medicine, Memorial Sloan Kettering Cancer Center, New  
6 York, NY 10065, USA

7 <sup>2</sup>Department of Molecular Biology, University of Texas Southwestern Medical Center, Dallas,  
8 TX, 75390, USA

9 <sup>3</sup>Laboratory of Chromosome and Cell Biology, The Rockefeller University, New York, NY 10065,  
10 USA

11 <sup>4</sup>Present address: The Institute of Cancer Research, London, SW3 6JB, UK

12 <sup>5</sup>Genomic Resources Core Facility, Weill Cornell Medical College, New York, NY, 10065, USA

13 <sup>6</sup>Microchemistry and Proteomics Core Laboratory, Memorial Sloan Kettering Cancer Center,  
14 New York, NY 10065, USA

15 <sup>7</sup>Cell Biology Program, Sloan Kettering Institute, Memorial Sloan Kettering Cancer Center, New  
16 York, NY 10065, USA

17 <sup>8</sup>Weill Cornell Medical College, New York, NY 10065, USA

18

19 \*corresponding authors. #Lead contact. Mailing address for Liang Deng and Ning Yang:  
20 Dermatology Service, Department of Medicine, Memorial Sloan Kettering Cancer Center, 1275  
21 York Ave., New York, NY 10065. Email: [dengl@mskcc.org](mailto:dengl@mskcc.org); [yangn@mskcc.org](mailto:yangn@mskcc.org).

22 **SUMMARY**

23

24 The DNA sensor cyclic GMP-AMP synthase (cGAS) is critical in host antiviral immunity.

25 Vaccinia virus (VACV) is a large cytoplasmic DNA virus that belongs to the poxvirus family.

26 How vaccinia virus antagonizes the cGAS-mediated cytosolic DNA-sensing pathway is largely

27 unknown. In this study, we screened 82 vaccinia viral genes to identify potential viral inhibitors

28 of the cGAS/Stimulator of interferon gene (STING) pathway. We discovered that vaccinia E5 is

29 a virulence factor and a major inhibitor of cGAS that elicits proteasome-dependent cGAS

30 degradation. E5 localizes to the cytoplasm and nuclei of infected cells. Cytosolic E5 triggers

31 K48-linked ubiquitination of cGAS and proteasome-dependent degradation via interacting with

32 cGAS. E5 itself also undergoes ubiquitination and degradation. Deleting the E5R gene from the

33 Modified vaccinia virus Ankara (MVA) genome strongly induces type I IFN production by

34 dendritic cells (DCs) and promotes DC maturation, thereby improving the immunogenicity of the

35 viral vector.

36 Keywords: poxvirus, innate immunity, type I IFN, bone marrow-derived dendritic cells, MVA,

37 E5R, viral vector, vaccination, ubiquitination

## 38 INTRODUCTION

39

40 Cyclic GMP-AMP synthase (cGAS) is a major cytosolic DNA sensor critical to antiviral,  
41 antitumor innate immunity, as well as in autoimmune inflammatory diseases (Ablasser and Chen,  
42 2019; Li et al., 2013; Schoggins et al., 2014; Wu et al., 2013). Once activated by cytosolic DNA,  
43 cGAS generates cyclic GMP-AMP (cGAMP), which in turn binds to an endoplasmic reticulum-  
44 localized protein STING, resulting in the activation of the TBK1/IRF3/IFNB pathway.  
45 Consequently, viruses have evolved to employ many strategies to evade this important antiviral  
46 pathway (Lau et al., 2015; Ma and Damania, 2016; Wu et al., 2015; Zhang et al., 2016).

47

48 Poxviruses are large cytoplasmic DNA viruses that are important human and veterinary pathogens  
49 as well as oncolytic agents and viral vectors. Vaccinia virus (VACV) was used successfully as a  
50 vaccine for smallpox eradication. However, direct infection of dendritic cells (DCs) with vaccinia  
51 results in inhibition of both innate and adaptive immune responses (Deng et al., 2006; Engelmayer  
52 et al., 1999; Jenne et al., 2000). Modified vaccinia virus Ankara (MVA) is a highly attenuated  
53 vaccinia strain with deletion of large fragments from its parental vaccinia genome following more  
54 than 570 serial passages in chicken embryo fibroblasts, rendering it non-replicative in most  
55 mammalian cells (Antoine et al., 1998; Sutter and Moss, 1992). MVA is an important vaccine  
56 vector and was recently approved as a second-generation vaccine against smallpox and  
57 monkeypox (Pittman et al., 2019; Volz and Sutter, 2017). Unlike wild-type VACV, MVA infection  
58 of bone marrow-derived dendritic cells induces type I IFN in a cGAS/STING-dependent manner  
59 (Dai et al., 2014).

60

61 cGAS is important for host defense against poxvirus infection. cGAS-deficient mice are more  
62 susceptible to intranasal infection with VACV (Schoggins et al., 2014) and to footpad inoculation  
63 with ectromelia virus, a mouse-specific poxvirus (Wong et al., 2019). Vaccinia B2R gene was  
64 recently discovered to encode a cytosolic cGAMP nuclease (renamed as poxin), and deletion of  
65 B2R from VACV resulted in attenuation in a skin scarification model (Eaglesham et al., 2019).  
66 However, whether poxviruses encode a direct inhibitor(s) of cGAS remains unknown.

67

68 In this study, we performed a screen of 82 vaccinia viral genes for inhibition of the cGAS/STING  
69 pathway using a dual-luciferase reporter assay and identified several vaccinia genes encoding  
70 proteins involved in down-regulating the cGAS/STING/IFNB pathway. Here we show that E5  
71 (encoded by the E5R gene), a BEN-domain-containing protein conserved among orthopoxviruses,  
72 is a virulence factor and a major inhibitor of cGAS. E5 interacts with cytoplasmic cGAS and  
73 triggers its degradation in a proteasome-dependent manner.

74

## 75 **RESULTS**

76

### 77 **Screening strategy for identifying viral inhibitors of the cGAS/STING pathway**

78 Vaccinia virus is a large cytoplasmic DNA virus with a 190 kilobase pairs (kbp) genome that  
79 encodes over 200 proteins. MVA has an approximately 30-kbp deletion from its parental vaccinia  
80 genome, resulting in the loss of many immune-modulatory viral genes (Antoine et al., 1998). MVA  
81 infection of bone marrow-derived dendritic cells (BMDCs) induced IFN- $\beta$  secretion and cGAMP  
82 production, whereas wild-type vaccinia (WT VACV) infection failed to do so (Figures 1A and  
83 1B). These results suggest that WT VACV might encode a viral inhibitor(s) to block cGAS  
84 activation and downstream IFN- $\beta$  production.

85

86 To identify potential cGAS inhibitors from the vaccinia genome, we first selected 82 viral genes,  
87 mainly the ones expressed at early times during vaccinia infection (Yang et al., 2010), with the  
88 reasoning that antagonists of innate immunity are likely encoded by viral early genes. A dual-  
89 luciferase assay was then performed to screen for the abilities of these viral proteins to inhibit the  
90 cGAS/STING-mediated cytosolic DNA-sensing pathway. Briefly, HEK293T-cells were  
91 transfected with plasmids expressing an IFNB-firefly luciferase reporter, a pRL-TK control  
92 plasmid expressing *Renilla* luciferase, murine cGAS, human STING, and individual vaccinia viral  
93 genes as indicated (Figure 1C). Adenovirus E1A, which inhibits this pathway via interaction with  
94 STING (Lau et al., 2015), was used as a positive control for this screening assay (Figure 1C). This  
95 assay identified several vaccinia viral early genes (E5R, K7R, B14R, C11R, WR199/B18R,  
96 WR200/B19R, E4L) as potential inhibitors of the cGAS/STING pathway (Figures 1C and 1D).  
97 Over-expression of all of the candidates except B14R had little effects on STING-induced IFNB  
98 promoter activity, suggesting that B14 might target STING or its downstream signaling pathways  
99 while other candidates might target cGAS (Figure 1E). Among these genes, WR200/B19R is  
100 known to encode a type I IFN binding protein (Symons et al., 1995). Although K7, B14, and C11  
101 have been described as vaccinia virulence factors (Benfield et al., 2013; Chen et al., 2008; Martin  
102 et al., 2012), and WR199/B18R was reported to encode a host range factor (Liu et al., 2018;  
103 Sperling et al., 2009), how they evade the type I IFN pathway is unclear. E4L encodes vaccinia  
104 RNA polymerase subunit RPO30 and a intermediate transcription factor (Ahn et al., 1990; Rosales  
105 et al., 1994), and is essential for vaccinia life cycle. Whereas E5 was reported to be a viral early

106 protein associated with the virosomes (viral factories) (Murcia-Nicolas et al., 1999), whether or  
107 not it plays a role in immune evasion is unknown.

108

### 109 **Deleting the E5R gene from the WT VACV genome results in cGAS-dependent type I IFN** 110 **induction in DCs**

111 We hypothesized that deleting a major inhibitor of the cGAS/STING pathway from the VACV  
112 genome would result in higher induction of type I IFN than other deletion mutants or the parental  
113 virus. To test this idea, we generated a series of recombinant VACV viruses with deletions of  
114 individual candidate viral inhibitors, including VACV $\Delta$ E5R, VACV $\Delta$ B2R, VACV $\Delta$ E3L,  
115 VACV $\Delta$ C11R, VACV $\Delta$ WR199, VACV $\Delta$ WR200, VACV $\Delta$ K7R, VACV $\Delta$ B14R, and  
116 VACV $\Delta$ C7L. Among them, only VACV $\Delta$ E5R could induce IFN- $\beta$  secretion from WT BMDCs,  
117 but not from cGAS<sup>-/-</sup> BMDCs (Figure 1F). VACV $\Delta$ E5R-E5R-Flag in which E5R was replaced by  
118 E5R-Flag failed to induce IFN- $\beta$  secretion, signifying that E5R-Flag is biologically active (Figure  
119 1F). Moreover, whereas B2 (encoded by the B2R gene) was identified as a cGAMP nuclease  
120 (Eaglesham et al., 2019), we found that VACV $\Delta$ B2R infection did not induce IFN- $\beta$  secretion  
121 from WT BMDCs (Figure 1F), suggesting the presence of other viral inhibitors of the  
122 cGAS/STING/IFNB pathway in VACV $\Delta$ B2R. In addition, VACV $\Delta$ E5R infection of WT BMDCs  
123 induced cGAMP production, indicating cGAS activation (Figure 1G). These results demonstrate  
124 that vaccinia E5R encodes a major inhibitor of cGAS.

125

### 126 **The vaccinia E5R gene, which encodes a BEN-domain protein, is conserved among** 127 **orthopoxviruses**

128 Vaccinia E5 is a 341-amino acid polypeptide, comprising an N-terminal alpha-helical domain  
129 (amino acids 60-106) and two BEN domains at the C-terminus (amino acid 112-222 and amino  
130 acid 233-328) (Figure S1A). BEN was named for its presence in BANP/SMAR1, poxvirus E5R,  
131 and NAC1 (Abhiman et al., 2008), and BEN domain-containing proteins function in DNA binding,  
132 chromatin organization, and transcriptional repression (Dai et al., 2013; Fedotova et al., 2019;  
133 Sathyan et al., 2011). E5R is conserved among orthopoxviruses (Figure S1B and S1C) but less so  
134 among yatapoxviruses and myxoma virus. However, E5R orthologs are absent in parapoxviruses,  
135 entomopoxviruses, fowlpox, molluscum contagiosum virus (data not shown). The E5 proteins  
136 from vaccinia (Western Reserve and Copenhagen), variola (the causative agent for smallpox), and

137 cowpox viruses contain an extra 10-amino acid sequence at the N-termini compared with E5  
138 proteins from vaccinia (Ankara), MVA, and ectromelia (mousepox) (Figure S1C). Interestingly,  
139 Monkeypox E5 has large deletions at both its N- and C-termini (Figure S1C, (Douglas and  
140 Dumbell, 1996).

141

### 142 **Vaccinia virus E5 is a virulence factor**

143 To test whether vaccinia E5 is a virulence factor, we performed an intranasal infection experiment  
144 with WT VACV or VACV $\Delta$ E5R ( $2 \times 10^6$  pfu) in WT C57BL/6J mice. All of the mice infected  
145 with WT VACV lost weight quickly, starting on the third day of infection, and either died or were  
146 euthanized due to more than 30% weight loss at days 7 to 8 post-infection (Figures 2A and 2B).  
147 By contrast, mice infected with VACV $\Delta$ E5R lost close to 15% of initial body weight on average  
148 at day 6 post-infection, and then recovered (Figures 2A and 2B). These results indicate that  
149 VACV $\Delta$ E5R is attenuated compared with WT VACV and thereby demonstrate that E5 is a  
150 virulence factor. Furthermore, VACV $\Delta$ E5R ( $2 \times 10^7$  pfu) gained virulence in *cGas*<sup>-/-</sup>, or *Sting*<sup>gt/gt</sup>  
151 mice but remained attenuated in *Mda5*<sup>-/-</sup> mice, indicating the cytosolic DNA-sensing pathway  
152 mediated by cGAS or STING is indispensable for host defense against intranasal infection with  
153 VACV $\Delta$ E5R (Figure 2C and 2D). Moreover, we detected IFN- $\beta$  in the bronchoalveolar  
154 lavage (BALF) 48 h after VACV $\Delta$ E5R infection (Figure 2E), indicating that intranasal infection  
155 with VACV $\Delta$ E5R infection could induce IFN- $\beta$  production in vivo.

156

157 To determine which domain(s) of E5 are required for E5-mediated inhibition of IFNB induction  
158 and virulence, we constructed VACV-E5R (full-length) and a series of its truncation mutants, as  
159 shown in Figure 2F. Whereas VACV-E5R (full-length) only mildly induced IFNB gene expression  
160 in BMDC cells (Figure 2G), all E5R truncation mutants induced IFNB gene expression at a similar  
161 level to VACV $\Delta$ E5R (Figure 2G). Moreover, intranasal infection of VACV-E5R (full-length) and  
162 E5R truncation mutants ( $2 \times 10^7$  pfu) in C57BL/6J mice showed that only VACV-E5R (full-length)  
163 infection was lethal, while all of the truncation mutants caused transient weight loss but 100%  
164 survival, except for VACV-E5R $\Delta$ 224N (with 80% survival) (Figure 2H and 2I). These results  
165 demonstrated that all E5 domains, including the N-terminal alpha-helical domain and the two BEN  
166 domains, are required for repression of *Ifnb* gene expression and virulence.

167

168 **Deleting E5R from the MVA genome strongly induces cGAMP production and type I IFN**  
169 **secretion in BMDCs.** To investigate whether the E5R gene of the MVA genome encodes a  
170 functional protein, we generated MVA $\Delta$ E5R. MVA $\Delta$ E5R infection of BMDCs potently  
171 upregulated *Ifnb1*, *Ifna*, *Ccl4*, and *Ccl5* gene expression (Figure 3A), whereas MVA infection had  
172 modest induction. MVA $\Delta$ E5R infection of BMDCs induced much higher levels of IFN- $\beta$  secretion  
173 than MVA, or heat-inactivated MVA (heat-iMVA), or heat-inactivated MVA $\Delta$ E5R (heat-  
174 iMVA $\Delta$ E5R) (Figure 3B). In addition, heat-iMVA $\Delta$ E5R caused higher levels of IFN- $\beta$  secretion  
175 than heat-iMVA (Figure 3B). Heat-inactivation at 55°C for one hour prevents viral protein  
176 expression in infected cells (Dai et al., 2017). Therefore the difference in IFN- $\beta$  induction between  
177 heat-iMVA $\Delta$ E5R and heat-iMVA-infected DCs might be attributed to virion E5 protein brought  
178 into the cells by heat-iMVA. IFN- $\beta$  induction in BMDCs depended on viral doses (Figure S2A),  
179 and that IFN- $\alpha$  secretion was also strongly induced by MVA $\Delta$ E5R infection in BMDCs (Figure  
180 3C). Consistent with that, MVA $\Delta$ E5R caused much higher levels of cGAMP production in  
181 BMDCs than MVA (Figure 3D). Similar to BMDC, MVA $\Delta$ E5R infection of bone marrow-derived  
182 macrophages (BMM) or plasmacytoid DCs (pDCs) also induced much higher levels of IFN- $\beta$   
183 secretion than MVA (Figure S2B and S2C). These results demonstrated that vaccinia E5 blocks  
184 cGAS activation, and deletion of E5R from the MVA genome potently activates the cGAS/STING  
185 pathway in multiple myeloid cell types. Furthermore, MVA $\Delta$ E5R-induced IFN- $\beta$  secretion from  
186 BMDCs was abolished in cGAS<sup>-/-</sup> or STING<sup>Gt/Gt</sup> cells and diminished in IRF3<sup>-/-</sup> or IRF7<sup>-/-</sup> cells  
187 (Figure 3E). In addition to BMDCs, MVA $\Delta$ E5R-induced IFN- $\beta$  secretion in BMMs, pDCs, or  
188 primary fibroblasts was also dependent on the cGAS/STING pathway (Figures S2D-S2F). These  
189 results demonstrate that the cGAS/STING-mediated cytosolic DNA-sensing pathway and the  
190 transcription factors IRF3 and IRF7 are required for MVA $\Delta$ E5R-induced IFN- $\beta$  secretion in  
191 various primary cell types.

192  
193 In addition to parental viral DNA provided by the incoming virions, progeny viral DNA generated  
194 after DNA replication in the virosomes may also stimulate the cytosolic DNA sensor cGAS,  
195 resulting in IFN- $\beta$  production. To evaluate this, we used phosphonoacetate (PAA) or aphidicolin  
196 to block viral DNA replication (DeFilippes, 1984; Moss and Cooper, 1982). PAA or aphidicolin  
197 treatment of MVA $\Delta$ E5R-infected MEFs blocked virosome formation as expected (Figure S2G),



198 and abolished the expressions of viral late genes such as A27 and A34 (Figure S2H). Both *Ifnb1*  
199 and *Ifna* gene expressions induced by MVA $\Delta$ E5R were partially reduced in the presence of PAA  
200 or aphidicolin (Figure S2I). Overall, our results indicate both the parental and progeny viral DNA  
201 from MVA $\Delta$ E5R-infected BMDCs contribute to type I IFN induction.

202

### 203 **WT VACV or MVA infection triggers cGAS degradation via a proteasome-dependent** 204 **mechanism**

205 To investigate how E5 antagonizes the cGAS/STING pathway, we first evaluated cGAS protein  
206 levels after WT VACV infection. We observed that cGAS protein levels were lower at six hours  
207 after WT VACV infection in BMDCs compared with mock-infection control (Figure 4A),  
208 suggesting that cGAS protein might be degraded after viral infection. Treatment with proteasome  
209 inhibitor MG132 prevented cGAS degradation, whereas treatment with a pan-caspase inhibitor, Z-  
210 VAD, or an AKT1/2 inhibitor VIII had little effect on cGAS levels (Figure 4A). Treatment with  
211 the protein translation inhibitor cycloheximide (CHX) partially blocked cGAS degradation,  
212 suggesting that the newly synthesized viral proteins might facilitate cGAS degradation (Figure  
213 4A). These results indicate that WT VACV-induced cGAS degradation is proteasome-dependent.  
214 Unlike WT VACV, VACV $\Delta$ E5R infection of BMDCs did not result in cGAS degradation (Figure  
215 4B). Similarly, whereas MVA infection of BMDCs triggered cGAS degradation, MVA $\Delta$ E5R  
216 infection did not (Figure 4C), confirming that E5 contributes to cGAS degradation in the context  
217 of either VACV or MVA infection. Similar to what we observed with VACV, MVA-induced  
218 decline of cGAS levels was fully reversed by MG132 and partially reversed by CHX (Figure 4D).  
219 In contrast, PAA did not affect MVA-caused reduction of cGAS levels, suggesting that the  
220 degradation of cGAS is independent of viral DNA replication (Figure 4D).

221

222 Using MEFs that express GFP-cGAS, in which GFP was tagged to the N-terminus of cGAS, we  
223 observed that at 6 h after MVA-mCherry infection, cytoplasmic cGAS was not detectable in  
224 mCherry<sup>+</sup> MVA-infected cells. However, nuclear cGAS remained in those infected cells,  
225 suggesting that MVA infection triggered the degradation of only cytoplasmic cGAS (Figure 4E).  
226 By contrast, in mCherry<sup>-</sup> uninfected cells, cGAS was degraded neither in the cytoplasm nor in the  
227 nucleus (Figure 4E). To better understand vaccinia E5 localization, we constructed a recombinant  
228 MVA expressing vaccinia E5-mcherry (MVA-E5R-mCherry), in which the C-terminus of vaccinia

229 E5 is fused with mCherry for live-cell imaging. At 6 h post-infection with MVA-E5-mCherry, E5  
230 was detected in both cytoplasm and nuclei of infected BMDCs (Figure 4F, upper panel) and MEFs  
231 (Figure 4F, lower panel). In the process of generating an MVA $\Delta$ E5R-E5R-Flag virus, we isolated  
232 one mutant strain, MVA $\Delta$ E5R-E5<sup>R95K</sup>-Flag, which contains a single nucleotide change (G284A),  
233 resulting in the replacement of arginine at amino acid 95 of E5 by lysine. E5<sup>R95K</sup>-Flag was  
234 expressed in the cytoplasm but was not in the nuclei of MVA $\Delta$ E5R-E5<sup>R95K</sup>-Flag-infected MEFs  
235 (Figure 4G). Infection of MEFs expressing GFP-cGAS with MVA $\Delta$ E5R-E5<sup>R95K</sup>-Flag resulted in  
236 the degradation of cGAS in the cytoplasm but not in the nucleus (Figure 4H). In addition, IFN- $\beta$   
237 production was diminished in BMDCs infected with MVA $\Delta$ E5R-E5<sup>R95K</sup>-Flag (Figure 4I),  
238 indicating that the cytoplasmic E5 is sufficient to induce cGAS degradation and to suppress type I  
239 IFN production.

240

#### 241 **Vaccinia virus E5 protein interacts with cGAS and promotes K48-linked poly-ubiquitination** 242 **of cGAS and subsequent degradation.**

243 To test whether E5 alone can trigger cGAS degradation without viral infection, we co-transfected  
244 a cGAS-expressing plasmid with an E5R-expressing plasmid or empty vector. 24 h later, cells  
245 were infected with MVA $\Delta$ E5R at a MOI of 10 for 6 h in the presence or absence of CHX. We  
246 observed that the cGAS level was decreased after co-transfection with the former but not the latter  
247 (Figure 5A and S3A). Moreover, MVA $\Delta$ E5R infection failed to enhance E5-mediated cGAS  
248 degradation in the presence or absence of CHX (Figure 5A), indicating that E5 alone can trigger  
249 cGAS degradation, likely in the context of plasmid transfection.

250

251 To assess whether E5 and cGAS interact with each other, we transfected HEK293T cells with HA-  
252 cGAS expression plasmid and then infected with MVA $\Delta$ E5R (in which mCherry was expressed  
253 independently of E5) or MVA-E5R-mCherry (in which mCherry was tagged to the E5 C-terminus)  
254 in the presence of MG132. Immunoprecipitation with anti-HA antibody pulled down E5-mCherry  
255 but not mCherry, thus indicating an E5-cGAS interaction (Figure 5B). Confocal imaging of MEFs  
256 expressing cGAS-GFP infected with MVA-E5R-mCherry virus in the presence of MG132 showed  
257 that E5 and cGAS co-localization to punctate cytoplasmic structures (Figure 5C).

258

259 We next hypothesized that vaccinia E5 induces cGAS ubiquitination and subsequent proteasome-  
260 dependent degradation. We detected higher levels of cGAS ubiquitination, particularly K48-linked  
261 poly-ubiquitination, in cells infected with MVA compared with those infected with MVA $\Delta$ E5R  
262 (Figure 5D). Thus, our results support that E5 expressed by MVA promotes K48-linked poly-  
263 ubiquitination of cGAS, leading to its degradation.

264

265 To test whether E5 binds to DNA, we used an *in vitro* transcription/translation system including  
266 reticulocyte lysate, T7 RNA polymerase, and <sup>35</sup>S-methionine. Radio-labeled cGAS or E5 proteins  
267 were tested for DNA binding by using DNA-coupled beads. Both cGAS and E5 could be pulled  
268 down individually with DNA-coupled beads but not by beads alone without DNA (Figures S3B).  
269 When cGAS and E5 were expressed together, both proteins could be pulled down by DNA-coupled  
270 beads. These results suggest E5 is capable of binding DNA. However, we cannot rule out whether  
271 cGAS and E5 compete for DNA binding in this assay, because DNA beads were used in excess  
272 (Figures S3B).

273

#### 274 **E5 is ubiquitinated in MVA-infected cells**

275 To evaluate whether E5 is ubiquitinated in MVA-infected cells, we first used Halo-4xUBA<sup>UBQLN1</sup>  
276 beads, which contain four tandem ubiquitin-associated (UBA) domains from Ubiquilin-1 to  
277 specifically pull down ubiquitinated proteins (Ordureau et al., 2014) in MVA-infected cells (Figure  
278 6A). Here we show that E5 was among the top viral proteins with a high % of coverage and high  
279 peptide numbers (Figure 6B). Other viral proteins that are enriched for ubiquitination include RNA  
280 polymerase subunits (A24, J6), viral DNA replication factors (I3, D5, E9), ribonucleotide  
281 reductase subunits (I4 and F4), and some immunomodulatory proteins (E5, B15, C16, E3, and C7).  
282 We next engineered a recombinant MVA with a human immunoglobulin (IgG) Fc domain-tagged  
283 to the C-terminus of E5, showing that E5-Fc protein was pulled down by protein A agarose.  
284 Subsequently, ubiquitinated E5 was determined by western blot using an anti-HA antibody, thus  
285 suggesting that E5 is ubiquitinated after viral infection (Figure 6C).

286

#### 287 **Deleting the E5R gene from MVA improves the immunogenicity of the vaccine vector.**

288 MVA has been investigated as a vaccine vector for various infectious diseases and cancers, and  
289 MVA infection modestly activates human monocyte-derived DCs (moDCs) (Drillien et al., 2004).

290 To investigate whether E5R deletion improves the immunogenicity of the viral vector, we first  
291 generated MVA $\Delta$ E5R-OVA, expressing a model antigen chicken ovalbumin (OVA) and then  
292 compared DC maturation upon MVA $\Delta$ E5R-OVA vs. MVA-OVA infection. We observed that  
293 MVA $\Delta$ E5R-OVA infection induced higher levels of CD86 and CD40 expression compared with  
294 MVA-OVA at 24 h post-infection (Figure 7A-C). However, both MVA $\Delta$ E5R-OVA and MVA-  
295 OVA-induced CD86 and CD40 expression diminished in cGAS<sup>-/-</sup> BMDCs, indicating that the  
296 cytosolic DNA-sensing pathway is essential for MVA $\Delta$ E5R-OVA or MVA-OVA-induced DC  
297 maturation (Figure 7A-C).

298  
299 RNA-seq analysis of WT or cGAS<sup>-/-</sup> BMDCs infected or mock-infected with either MVA or  
300 MVA $\Delta$ E5R demonstrated that MVA $\Delta$ E5R infection in WT BMDCs induced higher levels of type  
301 I IFN and pro-inflammatory cytokines and chemokines genes, including *Ifnb*, *Ccl5*, *Ccl12*, *Il12b*,  
302 *Il6*, *Il27*, DC maturation and activation markers such as *CD86*, *CD40*, and *CD69*, as well as genes  
303 involved in antigen cross-presentation, including *Tap1*, *H2-Q4*, *H2-Q6*, and *H2-Q7*, compared  
304 with MVA (Figure 7D, S4A and S4B). The upregulation of these genes by both MVA and  
305 MVA $\Delta$ E5R was cGAS-dependent (Figure 7D and S4C).

306  
307 Next, we performed vaccination through skin scarification (SS) or intradermal (ID) injection with  
308 either MVA-OVA or MVA $\Delta$ E5R-OVA. One week after vaccination, anti-OVA CD8<sup>+</sup> and CD4<sup>+</sup>  
309 T cells in the spleens and draining lymph nodes were analyzed. Vaccination with MVA $\Delta$ E5R-  
310 OVA resulted in more OVA-specific CD8<sup>+</sup> T cells in the spleens than MVA-OVA (Figure 7E).  
311 And more OVA-specific CD8<sup>+</sup> or CD4<sup>+</sup> T cells were detected in the draining lymph nodes (dLN)  
312 after MVA $\Delta$ E5R-OVA vaccination, compared with MVA-OVA (Figure 7E).

313 **DISCUSSION:**

314  
315 The identification of vaccinia E5 as a major inhibitor of the cytosolic DNA-sensor cGAS  
316 highlights the importance of that pathway in host defense against poxvirus infection. E5, a  
317 founding member of the BEN-domain family, is conserved among orthopoxviruses. Here we show  
318 that the virulence factor E5 binds to cGAS, triggering cGAS ubiquitination and proteasome-  
319 dependent degradation, and that deleting E5R from the MVA viral vector improves its  
320 immunogenicity.

321  
322 Virulent poxviruses, including VACV (Western Reserve and Copenhagen strains), cowpox, and  
323 ectromelia virus, fail to activate STING, unlike the highly attenuated derivative, MVA (Dai et al.,  
324 2014; Georgana et al., 2018). In addition, MVA but not WT VACV infection of BMDCs induces  
325 cGAMP production, suggesting that VACV encodes an inhibitor(s) of cGAS. Through an unbiased  
326 screen of 82 vaccinia genes, we identified several candidate genes that might encode cGAS  
327 inhibitors, including E5R, K7R, C11R, WR199/B18R, and WR200/B19R. We then focused on  
328 E5R, because a VACV mutant lacking E5R induced IFN- $\beta$  secretion and cGAMP production in  
329 BMDCs, while VACV mutants lacking other individual candidate genes failed to induce IFN- $\beta$   
330 secretion in BMDCs. In our study, VACV lacking the B2R gene, which encodes a cGAMP  
331 nuclease, fails to induce type I IFN production in BMDC, suggesting that there might be an  
332 additional vaccinia viral protein(s) antagonizing the cGAS/STING pathway.

333  
334 Although E5 was first identified by mass spectrometry as one of the three major early viral proteins  
335 associated with virosomes in vaccinia-infected cells (Murcia-Nicolas et al., 1999), the function of  
336 E5 remained elusive. E5 was also found in the highly purified virions by mass spectrometry after  
337 chemical crosslinking, and several interaction partners were identified, including RNA polymerase  
338 subunits RAP94, RP147, and NTP1 (Mirzakhanyan and Gershon, 2019). Here we show E5  
339 presence in both the nuclei and cytoplasm of the infected cells. In MVA $\Delta$ E5R-E5<sup>R95K</sup>-Flag-  
340 infected cells, E5<sup>R95K</sup> localizes only to the cytoplasm, but is sufficient for mediating cGAS  
341 degradation and IFN inhibition. The R95K mutation is within a putative nuclear localization signal  
342 of E5, <sup>92</sup>KFKRMIR<sup>98</sup>.

343  
344 We show that E5 mediates cGAS degradation via a proteasome-dependent pathway. We propose  
345 the following working model based on our results (Figure 6D). Vaccinia virus enters host cells via  
346 micropinocytosis (Mercer and Helenius, 2008). Upon viral entry, viral DNA is detected by the  
347 cytosolic DNA sensor cGAS, whose activation leads to cGAMP production and subsequent  
348 STING stimulation. However, in the presence of vaccinia E5, which is mainly synthesized by the  
349 incoming virions as an early viral protein, cGAS is targeted for ubiquitination and proteasome-  
350 dependent degradation through interacting with E5. This leads to reduced cGAMP production and  
351 *Ifnb1* gene expression. Some of the newly expressed E5 is ubiquitinated and degraded in the  
352 cytoplasm, while some of the E5 pool localizes to the nucleus. Although the function of nuclear  
353 cGAS is inhibited by nucleosomes (Boyer et al., 2020; Kujirai et al., 2020), E5 does not target  
354 nuclear cGAS for degradation. The function of nuclear E5 needs further investigation.

355  
356 We previously reported that viral replication is not important for MVA sensing in BMDCs (Dai et  
357 al., 2014). In this study, however, MVA $\Delta$ E5R-induced *Ifnb* gene expression was partially reduced  
358 in the presence of the viral DNA replication inhibitors, PAA and aphidicolin. This result suggests  
359 that virosomal progeny viral DNA is detected by cGAS in the setting of MVA $\Delta$ E5R infection.

360  
361 Various post-translational modifications of cGAS have been reported, including ubiquitination,  
362 phosphorylation, acetylation, sumoylation, glutamylation, neddylation, and caspase-mediated  
363 cleavage (Song et al., 2020; Wu and Li, 2020). For example, RNF185, a RING domain E3  
364 ubiquitin ligase, has been shown to interact with cGAS during human simplex virus-1 (HSV-1)  
365 infection, stimulating K27-linked poly-ubiquitination of cGAS, important for cGAS enzymatic  
366 activity (Wang et al., 2017). TRIM56, an IFN-inducible E3 ubiquitin ligase, interacts with cGAS  
367 to promote monoubiquitination and cGAS activity (Seo et al., 2018). In addition, TRIM14, an IFN  
368 inducible protein, recruits USP14 to cleave K48-linked poly-ubiquitin chains of cGAS and thereby  
369 inhibiting cGAS degradation (Chen et al., 2016). The ubiquitin E3 ligase responsible for K48-  
370 linked poly-ubiquitination remains elusive. Here we show that MVA infection induces K48-linked  
371 poly-ubiquitination of cGAS and promotes its degradation in a proteasome-dependent manner. E5  
372 is critical for this process via interacting with cGAS. However, the exact details of how E5 recruits

373 a viral or cellular E3 ubiquitin ligase to catalyze K48-linked poly-ubiquitination of cGAS remains  
374 to be determined.

375

376 Despite these limitations, the discovery of E5 as a major inhibitor of cGAS provides significant  
377 insights into improving MVA as a vaccine vector. Here we show that MVA $\Delta$ E5R-OVA infection  
378 of BMDCs induces high levels of IFN- $\beta$  production and DC maturation, consistent with cGAS-  
379 dependent transcriptomic changes induced by MVA $\Delta$ E5R. Vaccination with MVA $\Delta$ E5R-OVA  
380 induces higher levels of OVA-specific CD8<sup>+</sup> and CD4<sup>+</sup> T cells compared with MVA-OVA. Recent  
381 studies have shown that MVA-based vaccine vectors expressing SARS-CoV-2 spike protein  
382 induce potent anti-spike T and B cell immune responses and provides protection in animal models  
383 (Garcia-Arriaza et al., 2021; Liu et al., 2021; Routhu et al., 2021; Tscherne et al., 2021). Future  
384 investigations of whether MVA $\Delta$ E5R-based vaccine vectors improve vaccine efficacy against  
385 infectious agents such as SARS-CoV-2 is warranted.



Figure 1

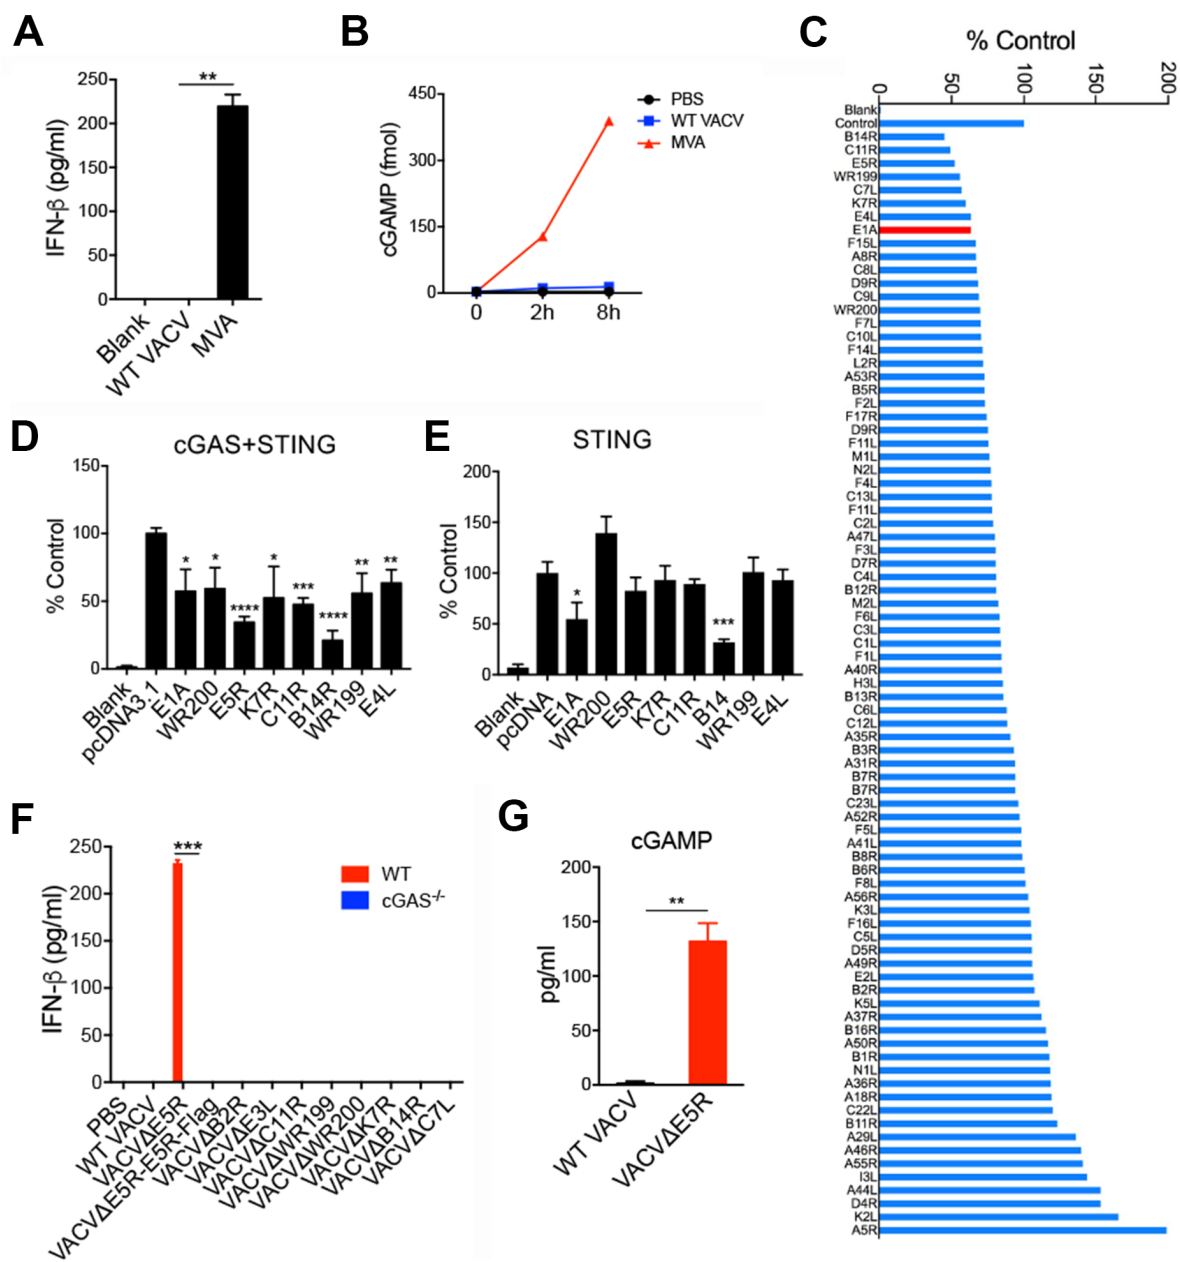



386 **Figure 1 Discovery of vaccinia virus E5 as a key inhibitor of the cGAS-dependent type I**  
387 **IFN pathway**

388 (A) ELISA analysis of IFN- $\beta$  levels in the supernatants of BMDCs infected with either WT  
389 VACV or MVA at a MOI of 10 for 16 h.

390 (B) cGAMP levels in BMDCs infected with either WT VACV or MVA at a MOI of 10. Cells  
391 were harvested at 2 and 6 h post infection. cGAMP levels were measured by LC-MS.

392 (C) A dual-luciferase assay to screen for vaccinia viral inhibitors of the cGAS-STING-mediated  
393 type I IFN pathway. HEK293T cells were transfected with an IFNB-firefly luciferase reporter, a  
394 control plasmid pRL-TK expressing *Renilla* luciferase, cGAS and STING-expressing plasmids,  
395 individual vaccinia protein-expressing plasmid, or pcDNA3.1 control plasmid. Adenovirus E1A-  
396 expressing plasmid was used as a positive control. Cells were harvested at 24 h post-transfection,  
397 and luminescence was determined and expressed as % control.

398 (D) Same as C. A dual-luciferase assay to verify potential vaccinia viral inhibitors of the cGAS-  
399 STING pathway.

400 (E) A dual-luciferase assay to verify potential vaccinia viral inhibitors of the STING-IFNB  
401 pathway. Similar to D, except that the cGAS-expressing plasmid was not co-transfected with  
402 STING-expressing plasmid.

403 (F) ELISA analysis of IFN- $\beta$  levels in BMDCs from WT or *cGas*<sup>-/-</sup> mice infected with different  
404 vaccinia viruses at MOI of 10 for 16 h.

405 (G) ELISA analysis of cGAMP levels in BMDCs from WT mice infected with either WT VACV  
406 or VACV $\Delta$ E5R at MOI of 10 for 16 h.

407 \* p<0.05, \*\* p<0.01, \*\*\* p<0.001 and \*\*\*\* p<0.0001 (unpaired t test).

Figure 2

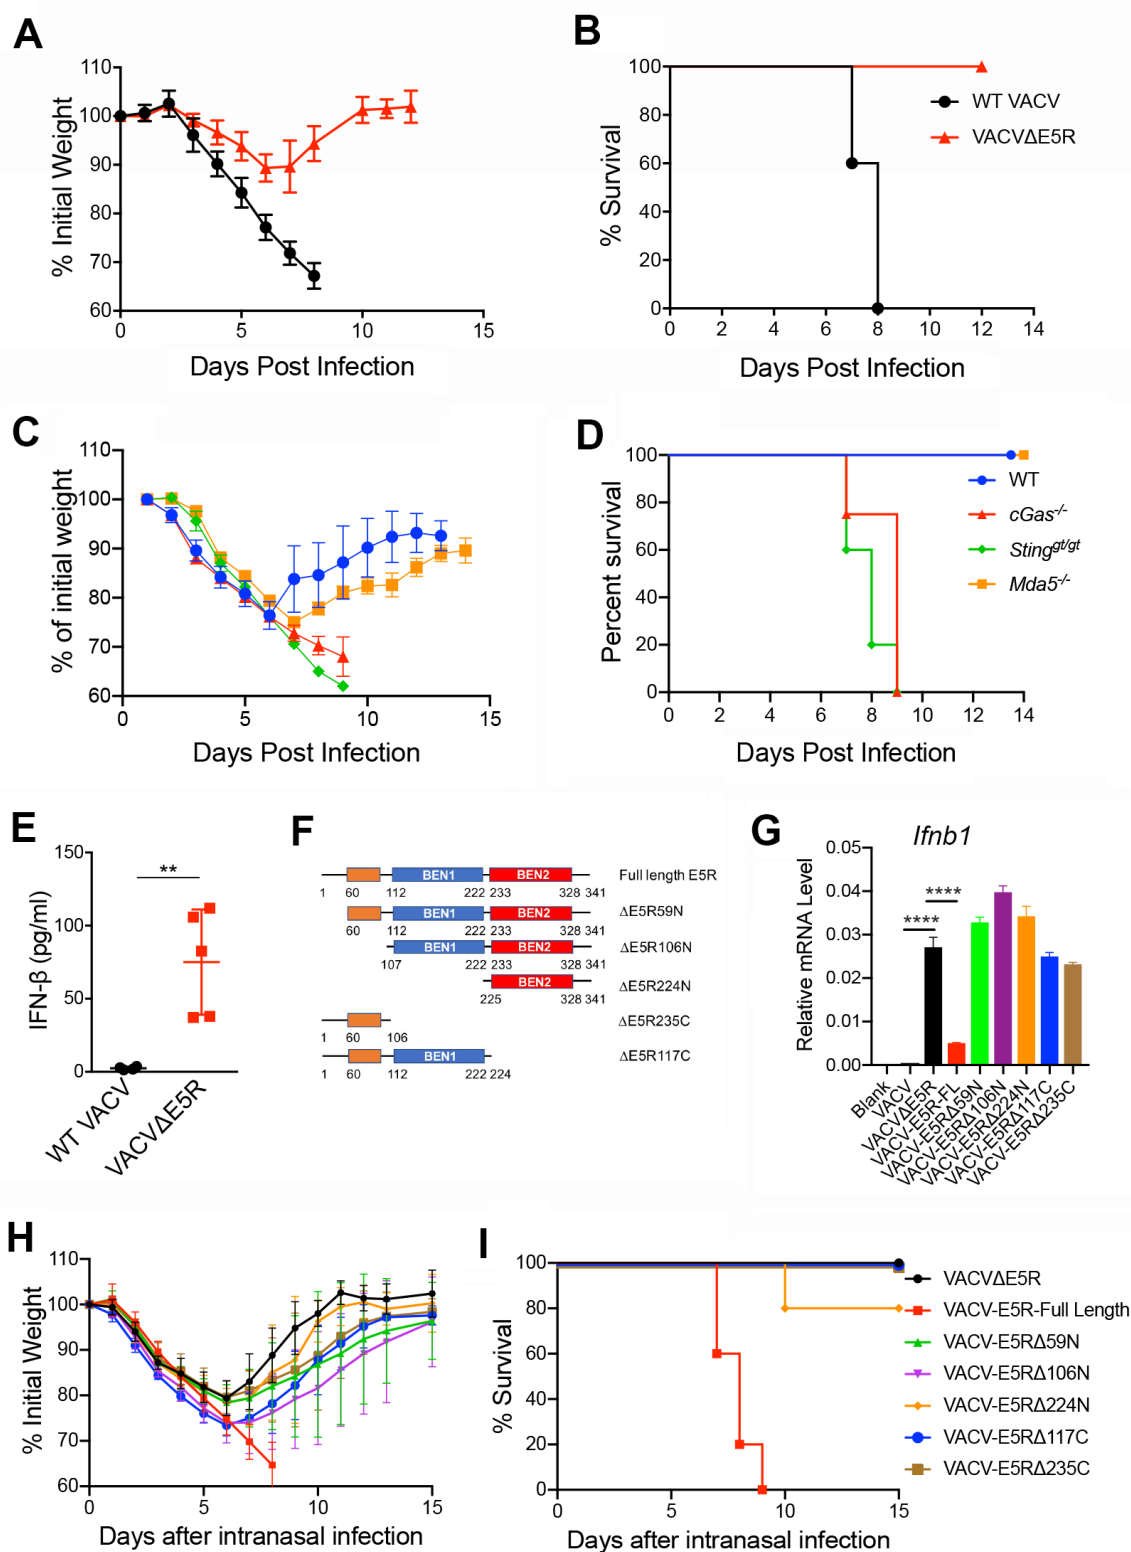

408 **Figure 2 Vaccinia virus E5 is a virulence factor in vivo**

409 (A-B) Percentages of initial weight (A) and Kaplan-Meier survival curves (B) of WT C57BL/6J  
410 mice (n=5 in each group) over days post-intranasal infection with either WT VACV or  
411 VACVΔE5R at a dose of  $2 \times 10^6$  pfu per mouse.

412 (C-D) Percentages of initial weight (C) and Kaplan-Meier survival curves (D) of WT, *Mda5*<sup>-/-</sup>,  
413 *cGas*<sup>-/-</sup>, or *Sting*<sup>gt/gt</sup> mice (n=5 in each group) over days post-intranasal infection with  
414 VACVΔE5R at a dose of  $2 \times 10^7$  pfu per mouse.

415 (E) ELISA analysis of IFN-β levels in the BALF harvested from WT mice at 48 h post-infection  
416 with WT VACV or VACVΔE5R at a dose of  $2 \times 10^7$  pfu per mouse.

417 (F) Schematic diagram of VACV E5R full-length revertant and various VACV E5R truncation  
418 mutants.

419 (G) RT-PCR analysis of *Ifnb* levels in WT BMDCs infected with different vaccinia viruses  
420 including VACV, VACVΔE5R, VACV-E5R-FL revertant, and various VACV E5R truncation  
421 mutants for 6 h.

422 (H-I) Percentages of initial weight (H) and Kaplan-Meier survival curves (I) of WT C57BL/6J  
423 mice (n=5 in each group) over days post-intranasal infection with VACVΔE5R, VACV-E5R-full  
424 length revertant, and various E5R truncation mutants a dose of  $2 \times 10^7$  pfu per mouse.

425 \*\* p<0.01 and \*\*\*\* p<0.0001 (unpaired t test).

426 **Figure 3**

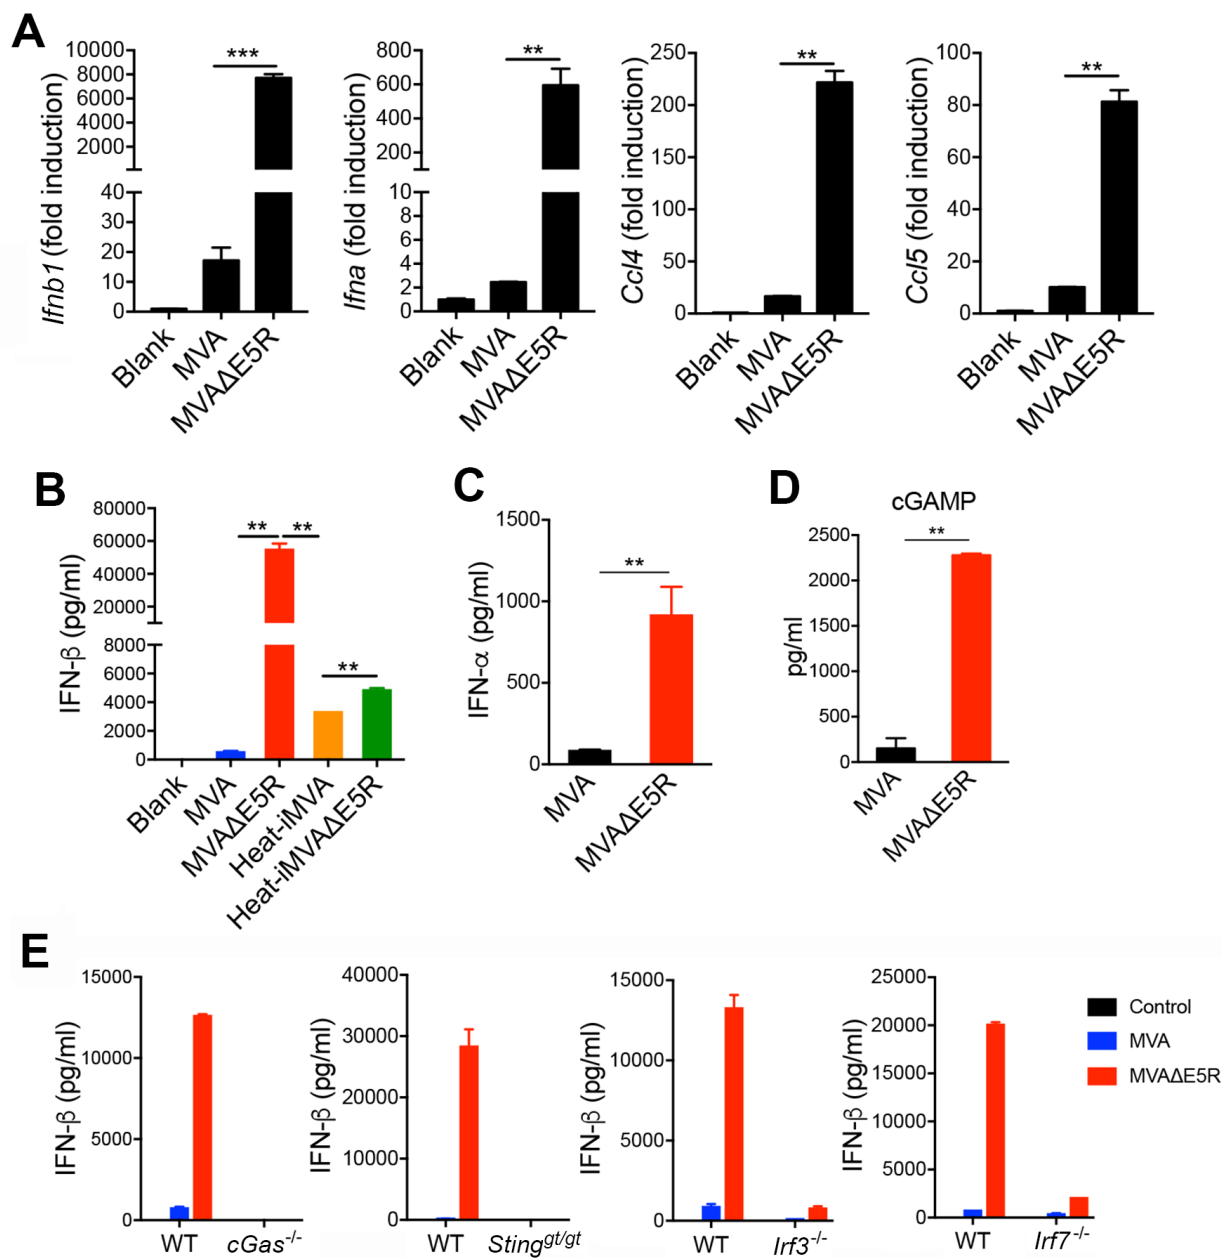

427 **Figure 3 MVAΔE5R strongly induces type I IFN production in a cGAS/STING,**  
428 **IRF3/IRF7-dependent manner**  
429 (A) RT-PCR of *Ifnb1*, *Ifna*, *Ccl4*, and *Ccl5* gene expression in WT BMDCs infected with either  
430 MVA or MVAΔE5R at a MOI of 10 for 6 h.  
431 (B-C) ELISA analyses of IFN-β or IFN-α levels in the supernatants of WT BMDCs infected  
432 with MVA, MVAΔE5R, Heat-iMVA or Heat-iMVAΔE5R at a MOI of 10 for 16 h.  
433 (D) ELISA analyses of cGAMP levels in WT BMDCs infected with MVA or MVAΔE5R at a  
434 MOI of 10 for 16 h.  
435 (E) ELISA analyses of IFN-β levels in the BMDC from WT, *cGas*<sup>-/-</sup>, *Sting*<sup>gt/gt</sup>, *Irf3*<sup>-/-</sup>, and *Irf7*<sup>-/-</sup>  
436 mice infected with MVA or MVAΔE5R at a MOI of 10 for 16 h.  
437 \*\* p<0.01, \*\*\* p<0.001 and \*\*\* p<0.001 (unpaired t test).

**Figure 4**

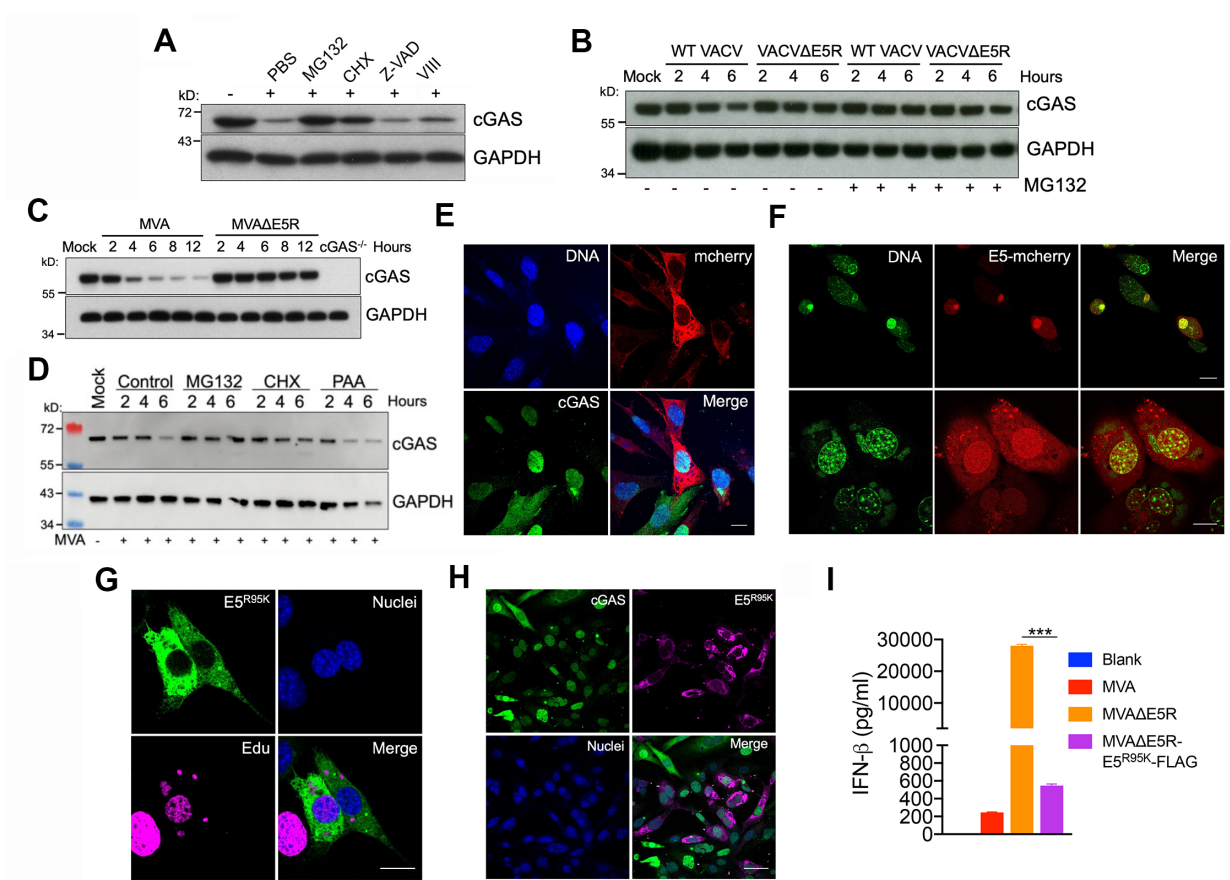

438 **Figure 4 WT VACV or MVA infection induces proteasome-dependent degradation of cGAS**

439 (A) Immunoblot of cGAS in MEFs infected with WT VACV for 6 h. Cells were pretreated with  
440 either cycloheximide (CHX, 25 µg/ml), a proteasome inhibitor MG132 (25 µM), a pan-caspase  
441 inhibitor Z-VAD (50 µM), an AKT1/2 inhibitor VIII (10 µM) for 30 min and then infected with  
442 WT VACV in the presence of each individual drug. Cells were collected at 6 h post-infection.

443 (B) Immunoblot of cGAS in BMDCs infected with either WT VACV or VACVΔE5R. Cells  
444 were pre-treated with or without MG132 (25 µM) for 30 min and infected with WT VACV or  
445 VACVΔE5R in the presence or absence of MG132. Cells were collected at 2, 4 and 6 h post-  
446 infection.

447 (C) Immunoblot of cGAS in BMDCs infected with MVA or MVAΔE5R.

448 (D) Immunoblot of cGAS in BMDC infected with MVA. Cells were pre-treated with MG132 (25  
449 µM), CHX (25 µg/ml), PAA (200 µg/ml) or PBS for 30 min and then infected with MVA at a  
450 MOI of 10 in the presence of each drug or PBS control. Cells were collected at 2, 4 and 6 h post-  
451 infection.

452 (E) Representative confocal images showing GFP-cGAS protein in GFP-cGAS MEFs cells after  
453 MVA-mCherry infection for 6 h. Scale bar, 15 µm.

454 (F) Representative confocal images showing E5-mCherry expression in BMDCs (top) or MEFs  
455 (bottom) after MVA-E5R-mCherry infection at a MOI 10 for 6 h. DNA staining with SiR-DNA  
456 dye highlights nuclei and virosomes. Scale bar, 15 µm.

457 (G) Representative confocal images showing E5<sup>R95K</sup>-Flag expression in MEFs after MVAΔE5R-  
458 E5<sup>R95K</sup>-Flag infection for 6 h. Nuclear and virosomal DNAs were stained EdU. Scale bar, 15 µm.

459 (H) Representative confocal images showing E5<sup>R95K</sup>-Flag and cGAS in GFP-cGAS MEFs after  
460 MVAΔE5R- E5<sup>R95K</sup>-Flag infection for 6 h. Scale bar, 15 µm.

461 (I) ELISA analyses of IFN-β levels in supernatants of BMDCs infected with MVA, MVAΔE5R  
462 or MVAΔE5R- E5<sup>R95K</sup>-Flag at a MOI of 10 for 16 h.

**Figure 5**

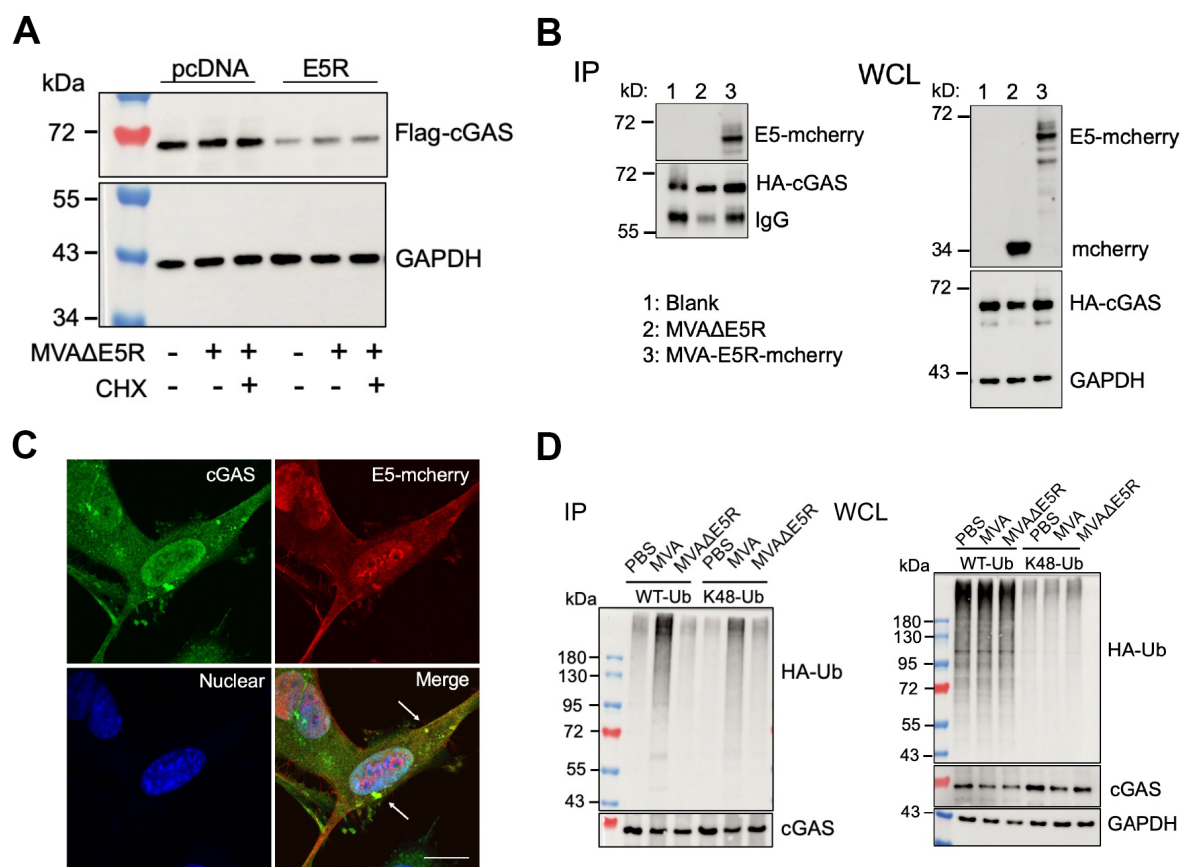



463 **Figure 5 E5 interacts with cGAS and promotes K48-linked poly-ubiquitination of cGAS**

464 (A) HEK293T cells were co-transfected with Flag-cGAS and pcDNA-E5R or pcDNA3.1  
465 plasmids. 24 h later, cells were infected with MVA $\Delta$ E5R at a MOI of 10 for 6 h in the presence  
466 or absence of CHX (25  $\mu$ g/ml). Flag-cGAS protein levels were determined by an anti-Flag  
467 antibody.

468 (B) HEK293T cells were transfected with an HA-cGAS-expressing plasmid. 24 h later, cells  
469 were infected with either MVA $\Delta$ E5R or MVA $\Delta$ E5R-E5R-mCherry at a MOI of 10 for 6 h in the  
470 presence of MG132 (25  $\mu$ M). HA-cGAS was pulled down by an anti-HA antibody and E5-  
471 mCherry was determined by an anti-mCherry antibody.

472 (C) Representative confocal images showing cGAS and E5-mCherry co-localization in the  
473 cytoplasm of MEF-cGAS-GFP cells after MVA-E5R-mCherry infection at MOI 10 for 6 h in the  
474 presence of MG132 (25  $\mu$ M). Scale bar, 15  $\mu$ m. White arrows point to some representative  
475 puncta of E5 and cGAS co-localization in the cytoplasm.

476 (D) HEK293T cells were co-transfected with V5-cGAS and HA-Ub (WT or K48 only)-  
477 expressing plasmids. 24 h later, cells were infected with MVA or MVA $\Delta$ E5R at MOI 10 for 6 h  
478 at the presence of MG132 (25  $\mu$ M). cGAS was pulled down by an anti-V5 antibody and  
479 ubiquitinated cGAS was determined by an anti-HA antibody. IP: immunoprecipitation. WCL:  
480 whole cell lysates.

Figure 6

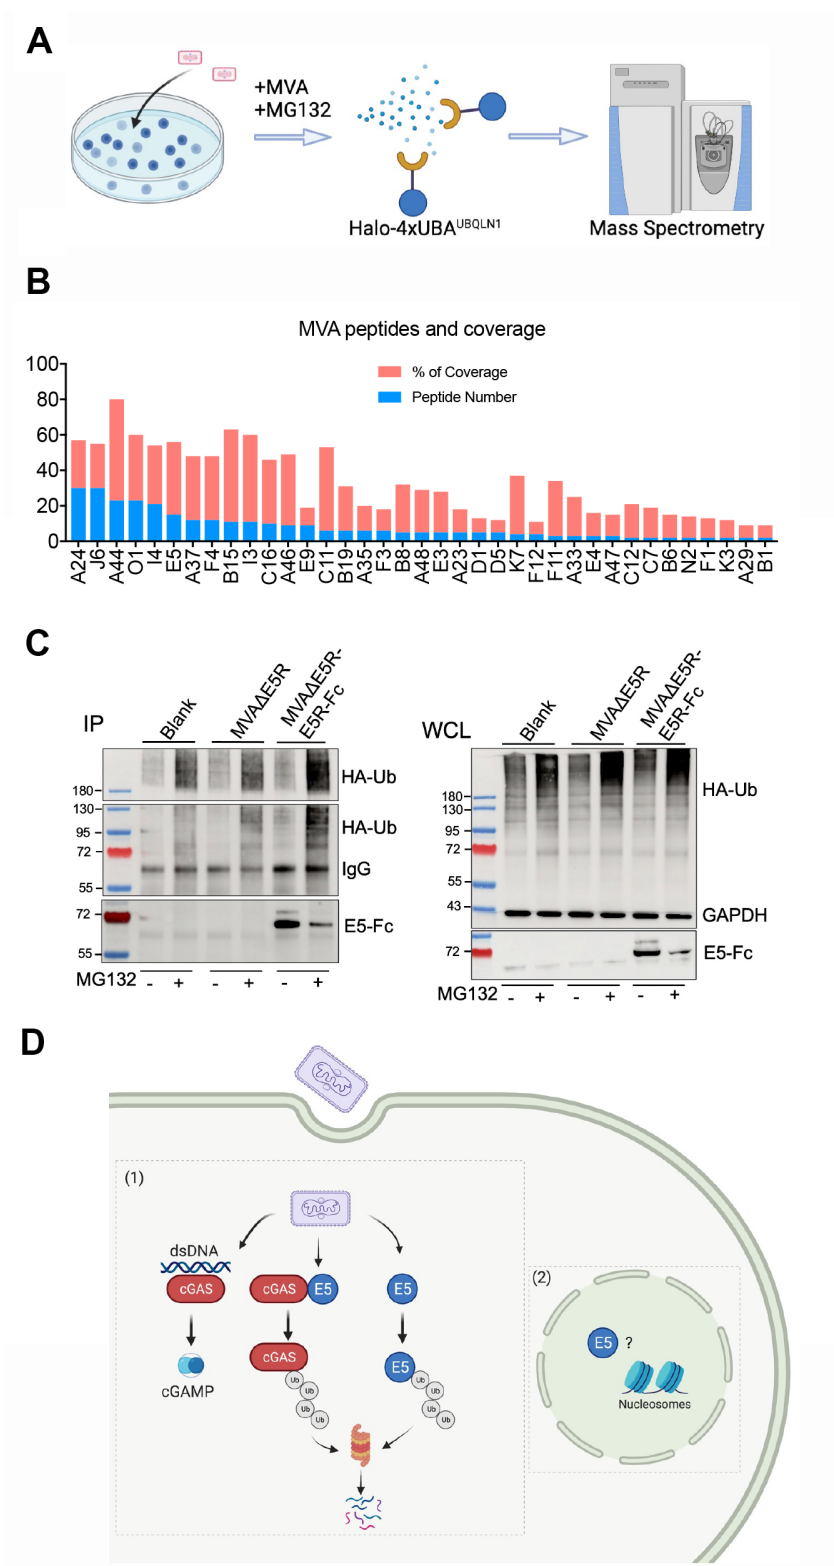

481 **Figure 6 E5 protein is ubiquitinated after MVA infection and working model.**

482 (A) Schematic diagram of the experimental design. In brief, HEK293T cells were infected with  
483 MVA at a MOI 10 for 6 h in the presence of MG132 (25  $\mu$ M). Ubiquitinated proteins were  
484 pulled down by Halo-4xUBA<sup>UBQLN1</sup> beads, which have high affinity to ubiquitinated proteins.  
485 After further purification, peptides bound to beads were measured by mass spectrometry.

486 (B) Peptide numbers and coverage of MVA peptides from mass spectrometry.

487 (C) HEK293T cells were transfected with HA-Ub (WT)-expressing plasmid. 24 h later, cells  
488 were infected with MVA $\Delta$ E5R or MVA $\Delta$ E5R-E5-Fc at a MOI of 10 for 6 h. Cells were treated  
489 with or without MG132 (25  $\mu$ M) during infection. E5-Fc was pulled down by protein A agarose  
490 and ubiquitinated E5 was determined by an anti-HA antibody.

**Figure 7**

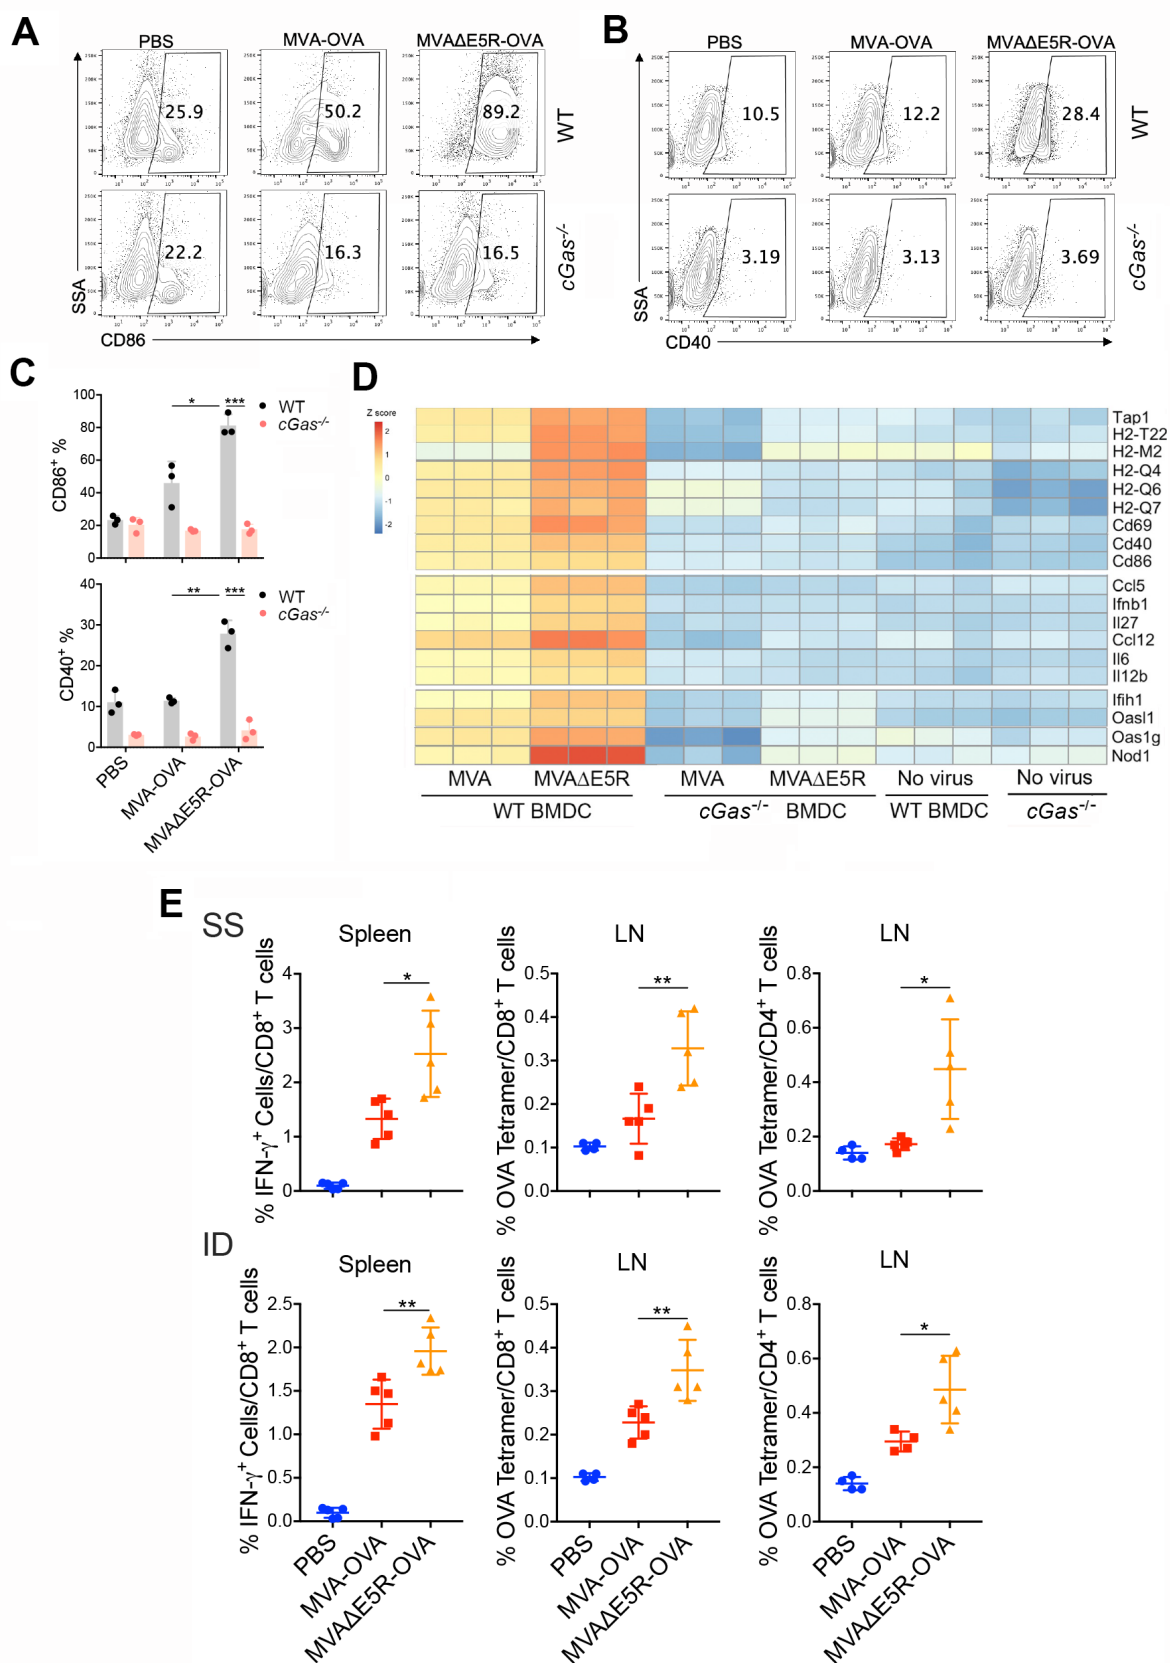

491 **Figure 7 MVA $\Delta$ E5R-OVA promotes DC maturation and antigen-specific CD8<sup>+</sup> T cells**  
492 **activation**

493 (A-C) Representative flow cytometry dot plots (A, B) or analysis (C) of CD86 and CD40  
494 expression in WT or *cGas*<sup>-/-</sup> BMDC infected with MVA-OVA or MVA $\Delta$ E5R-OVA at MOI 10  
495 for 16 h.

496 (D) Heatmap showing relative expression of selected immune-related genes in WT or *cGas*<sup>-/-</sup>  
497 BMDC infection with MVA or MVA $\Delta$ E5R. These include genes involved in antigen  
498 presentation, DC activation, IFN and proinflammatory cytokines and chemokines, and innate  
499 immune sensors.

500 (E) Antigen-specific T cell responses after vaccination with MVA-OVA or MVA $\Delta$ E5R-OVA.  
501 C57BL/6J mice were vaccinated with MVA-OVA or MVA $\Delta$ E5R-OVA via skin scarification  
502 (SS) or intradermal injection (ID). One week later, spleens and draining lymph nodes (dLNs)  
503 were harvested and SIINFEKL-specific CD8<sup>+</sup> T cells in splenocytes and OVA tetramer-specific  
504 CD8<sup>+</sup> or CD4<sup>+</sup> T cells in lymph nodes were determined by FACS.

505 \* p<0.05, \*\* p<0.01 and \*\*\* p<0.001 (unpaired t test).

506 **Acknowledgements**

507

508 We thank the Flow Cytometry Core Facility and Molecular Cytology Core Facility at the Sloan  
509 Kettering Institute. We thank Drs. Charles Rice and Stewart Shuman for helpful discussions. We  
510 thank Curt Balch for editing. This work was supported by NIH grants K-08 AI073736 (L.D.),  
511 R56AI095692 (L.D.), R03 AR068118 (L.D.), and MSK Technology Development Fund (L.D.),  
512 sponsored research agreement from IMVAQ Therapeutics (L.D.). Cancer Prevention and  
513 Research Institute of Texas, RP180725 (Z.J.C.). Z.J.C. is an investigator of the Howard Hughes  
514 Medical Institute. This research was also funded in part through the NIH/NCI Cancer Center  
515 Support Grant P30 CA008748.

516

517 **Author Contributions**

518 Author contributions: N.Y. and L.D. were involved in all aspect of this study, including conceiving  
519 the project, designing and performing experiments, data analyses and interpretation, manuscript  
520 writing. N.Y. designed the screen for vaccinia inhibitors of the cytosolic DNA-sensing pathway  
521 and performed most of the experiments. Y.W. assisted N.Y. in the screen and validation of vaccinia  
522 inhibitors. Y.W. and L.D. performed RNA-seq experiments. Y.W. and L.D. generated various  
523 VACV E5 deletion viruses and performed pathogenesis studies. P.D. and T.L. are involved in  
524 cGAMP measurement in BMDCs infected by vaccinia and MVA. A.T, T.Z., and J.Z.X. analyzed  
525 RNA-seq data, and assisted in manuscript preparation. C.Z. and H.F. are involved the cGAS and  
526 E5 DNA-binding assay. H.P., Z.L, R.H., and A.O. are involved LS/MS determination of  
527 ubiquination viral proteins. A.O., C.Z., H.F., and Z.J.C. assisted in experimental design, data  
528 interpretation, and manuscript preparation. L.D. provided overall supervision of the project.

529

530 **Competing interests**

531 Memorial Sloan Kettering Cancer Center filed a patent application for the discovery of vaccinia  
532 viral inhibitors of the cytosolic DNA-sensing pathway and its use for improving MVA and  
533 vaccinia as oncolytic agents and vaccine vectors. The patent has been licensed to IMVAQ  
534 Therapeutics. L.D. and N.Y. are co-founders of IMVAQ Therapeutics.

535

## 536 **MATERIALS AND METHODS**

537

### 538 **Mice**

539 Female C57BL/6J mice between 6 and 8 weeks of age were purchased from the Jackson  
540 Laboratory and were used for the preparation of bone marrow-derived dendritic cells (BMDCs)  
541 and for intranasal infection experiments. *cGas*<sup>-/-</sup> mice were purchased from the Jackson  
542 Laboratory. *Sting*<sup>gt/gt</sup> mice were generated in the laboratory of Russell Vance (University of  
543 California, Berkeley) (Sauer et al., 2011). *Mda5*<sup>-/-</sup> mice were generated in Marco Colonna's  
544 laboratory (Washington University) (Gitlin et al., 2006). These mice were maintained in the animal  
545 facility at the Sloan Kettering Cancer Institute. All procedures were performed in strict accordance  
546 with the recommendations in the Guide for the Care and Use of Laboratory Animals of the National  
547 Institute of Health and the protocol was approved by the Committee on the Ethics of Animal  
548 Experiments of Sloan-Kettering Cancer Institute.

549

### 550 **Viruses**

551 The Western Reserve (WR) strain of vaccinia virus (VACV) was propagated, and virus titers were  
552 determined on BSC40 (African green monkey kidney cells) monolayers at 37°C. MVA and MVA-  
553 OVA viruses were kindly provided by Gerd Sutter (University of Munich) and propagated in  
554 BHK-21 (baby hamster kidney cell, ATCC CCL-10) cells. All viruses were purified through a  
555 36% sucrose cushion. Heat-iMVA or Heat-iMVAΔE5R was generated by incubating purified  
556 MVA or MVAΔE5R virus at 55 °C for 1 hour. To generate recombinant VACVΔE5R virus,  
557 BSC40 cells were infected with WT vaccinia virus (WR) at a MOI of 0.2. After 1-2 h, cells were  
558 transfected with pE5R-mCherry plasmids with Lipofectamine 2000 (Invitrogen). Homologous  
559 recombination between the plasmid DNA and vaccinia viral genome resulted in the deletion of  
560 *E5R* gene from the viral genome and insertion of mCherry, under the control of the vaccinia  
561 synthetic early and late promoter (pSE/L). Cells were collected two days later and underwent three  
562 cycles of freeze-thaw. Plaque purification was performed based on the mCherry fluorescence seen  
563 under the microscope. After 4-5 rounds, pure recombinant VACVΔE5R-mCherry viruses were  
564 obtained, and validation of E5R deletion confirmed by PCR analyses and DNA sequencing.  
565 Various other deletion mutants, including VACVΔB2R, VACVΔE3L, VACVΔC11R,  
566 VACVΔWR199, VACVΔWR200, VACVΔK7R, VACVΔB14R, and VACVΔC7L were

567 generated following a procedure similar to that described above. VACV $\Delta$ E5R-E5R-Flag was  
568 generated by inserting the E5R-Flag sequence into the *TK* locus of VACV $\Delta$ E5R. VACV-E5R-FL,  
569 VACV-E5R $\Delta$ 59N, VACV-E5R $\Delta$ 106N, VACV-E5R $\Delta$ 224N, VACV-E5R $\Delta$ 117C and VACV-  
570 E5R $\Delta$ 235C were generated by inserting full-length or truncated E5R into the *E5R* locus of  
571 VACV $\Delta$ E5R. MVA $\Delta$ E5R and MVA $\Delta$ E5R-OVA expressing mCherry was generated through  
572 homologous recombination at the E4L and E6R loci flanking *E5R* gene of the MVA or MVA-  
573 OVA genome in BHK21 cells following a procedure similar to that described above. MVA $\Delta$ E5R-  
574 E5R-Fc was generated by inserting E5R-Fc sequence into the *TK* locus of MVA $\Delta$ E5R using  
575 fluorescence color selection. MVA-E5R-mCherry was generated by inserting E5R-mCherry  
576 sequence into the *TK* locus of MVA. MVA $\Delta$ E5R-E5<sup>R95K</sup>-Flag was generated by inserting E5R-  
577 Flag sequence into the *TK* locus of MVA $\Delta$ E5R using drug selection. The recombinant virus was  
578 enriched in the presence of gpt selection medium including MPA, xanthine and hypoxanthine, and  
579 plaque purified for at least four rounds. During the selection process, a spontaneous mutation  
580 occurred resulting in the generation of MVA $\Delta$ E5R-E5<sup>R95K</sup>-Flag, verified by PCR and DNA  
581 sequencing.

#### 582 **Intranasal infection of vaccinia virus in mice**

583 Female C57BL/6J mice between 6 and 8 weeks of age (5- 10 in each group) were anesthetized and  
584 infected intranasally with WT VACV, VACV $\Delta$ E5R or VACV $\Delta$ E5 expressing E5R full-length  
585 revertant and various E5R truncation mutants at the indicated doses in 20  $\mu$ l PBS. Mice were  
586 monitored and weighed daily. Those that lost over 30% of their initial weight were euthanized.  
587 Kaplan-Meier survival curves were determined. Bronchoalveolar lavage fluid (BALF) was  
588 harvested following intratracheal infusion of 1 ml of cold PBS.

589

#### 590 **Vaccination with MVA-OVA or MVA $\Delta$ E5R-OVA**

591 6 to 8-week-old Female C57BL/6J mice were vaccinated via skin scarification (SS) or intradermal  
592 (ID) injection with MVA-OVA or MVA $\Delta$ E5R-OVA at a dose of  $2 \times 10^7$  pfu. One week later,  
593 spleens and draining lymph nodes (dLNs) were collected and processed using the Miltenyi  
594 GentleMACS™ Dissociator. Splenocytes were stimulated with OVA<sub>257-264</sub> (SIINFEKL) peptide  
595 (5  $\mu$ g/ml). After 1 h of stimulation, GolgiPlug (BD Biosciences) (1:1000 dilution) was added and  
596 incubated for 12 h. Cells were then treated with BD Cytofix/Cytoperm™ kit prior to staining with



597 respective antibodies for flow cytometry analyses. The antibodies used for this assay are as  
598 follows: BioLegend: CD3e (145-2C11), CD4 (GK1.5), CD8 (53-5.8), IFN- $\gamma$  (XMG1.2).

599  
600 dLNs were digested with collagenase D (2.5 mg/ml) and DNase (50  $\mu$ g/ml) at 37°C for 25 min  
601 before filtering through 70- $\mu$ m cell strainer. For tetramer staining, cells were incubated with  
602 tetramers for 30 mins at 37 °C. Alexa Fluor 647 H-2K(b) ova 257-264 SIINFEKL tetramer and  
603 PE I-A(b) Ova 329-337 AAHAEINEA tetramer were synthesized from NIH Tetramer Core  
604 Facility. Cells were analyzed on the BD LSRFortessa.

605  
606 **Cell lines and primary Cells**

607 BSC40, HEK293T, MEFs, and cGAS-GFP MEFs (Yang et al., 2017) were cultured in Dulbecco's  
608 modified Eagle's medium supplemented with 10% fetal bovine serum (FBS), 2 mM L-glutamine  
609 and 1% penicillin-streptomycin. BHK-21 were cultured in Eagle's Minimal Essential Medium  
610 (Eagle's MEM, Life Technologies, Cat# 11095-080) containing 10% FBS, and 1% penicillin-  
611 streptomycin. For the generation of GM-CSF-BMDCs, bone marrow cells (5 million cells in each  
612 15 cm cell culture dish) were cultured in RPMI-1640 medium supplemented with 10% fetal bovine  
613 serum (FBS) in the presence of GM-CSF (20 ng/ml, BioLegend, Cat# 576304) for 9-12 days as  
614 described in (Dai et al., 2014). For the generation of bone marrow-derived macrophages (BMMs),  
615 bone marrow cells were cultured in RPMI-1640 medium supplemented with 10% fetal bovine  
616 serum (FBS) in the presence of M-CSF (10 ng/ml, PeproTech, Cat# 315-02) for 7-9 days.

617  
618 To culture primary murine plasmacytoid dendritic cells (pDCs), bone marrow cells were cultured  
619 in RPMI-1640 medium supplemented with 10% FBS in the presence of FMS-like tyrosine kinase  
620 3 ligand (Flt3L) (100 ng/ml, R&D Systems, Cat# 308-FK) for 7-9 days. Cells were fed every 2–3  
621 days by replenishing 50% of the medium. pDCs were gated as B220<sup>+</sup>PDCA-1<sup>+</sup> cells and sorted in  
622 a FACS Aria II instrument (BD Biosciences) as described in (Dai et al., 2011). The antibodies  
623 used for this assay are as follows: B220 (RA3-6B2) and PDCA-1 (927) from Biolegend.

624  
625 Mice epidermal sheet were removed as previously described (Deng et al., 2008). Briefly, skins  
626 were washed with cold Ca<sup>2+</sup> and Mg<sup>2+</sup> free PBS and then incubated in a digestion buffer  
627 containing 1 U dispase/ml at 37°C for 1 h. Epidermal sheets were mechanically removed, the

628 remaining dermis was washed in Ca<sup>2+</sup> and Mg<sup>2+</sup> free PBS 5 times and incubated in a digestion  
629 buffer containing 2 mg/ml collagenase A (Roche), 100 µg/ml of DNase I (Sigma; d4527) and 1%  
630 BSA in Ca<sup>2+</sup> and Mg<sup>2+</sup> free PBS at 37°C for 1-2 hours. The resulting suspension was filtered  
631 through a 100-, 70- and 40-mm nylon mesh sequentially (VWR) and washed two times with a  
632 buffer (Ca<sup>2+</sup> and Mg<sup>2+</sup> free PBS containing 1% BSA and 2 mM EDTA). Cells were cultured  
633 RPMI-1640 medium supplemented with 10% fetal bovine serum (FBS). Only the adherent cells  
634 were used after 2-3 days of culture.

### 635 **Cytokine assays**

636 The IFN-β levels in BALF were determined using mouse IFN beta ProQuantum Immunoassay kit  
637 (ThermoFisher). IFN-α and IFN-β levels in the supernatants of cultured BMDCs were determined  
638 by ELISA (PBL Biomedical Laboratories).

639

### 640 **Flow cytometry analysis for DC maturation**

641 GM-CSF-BMDCs from WT or cGAS<sup>-/-</sup> mice were infected with either MVA-OVA or MVAΔE5R-  
642 OVA at a MOI of 10 for 16 h. Cells were washed with MACS buffer (Miltenyi Biotec) and stained  
643 with antibodies against CD40 (3/23, Biolegend) and CD86 (GL-1, Biolegend). FACS analyses  
644 were performed using LSRFortessa™ Cell Analyzer (BD Biosciences). Data were analyzed with  
645 FlowJo software (version 10.5.3).

646

### 647 **Immunofluorescence imaging**

648 Cultured cells were plated in Lab-Tek™ II chamber slide (ThermoFisher) and fixed in 4% (w/v)  
649 paraformaldehyde at room temperature (RT) for 10 min, permeabilized with 0.5% (v/v) Triton X-  
650 100 in PBS for 5 min, and blocked in 5% goat serum (Sigma), 3% bovine serum albumin (Fisher),  
651 and 0.1% Triton X-100 at room temperature for 1 hr. Primary antibodies were incubated at 4 °C  
652 at the indicated dilutions overnight: chicken anti-GFP (1:1000, Abcam), rat anti-mCherry (1:1000,  
653 ThermoFisher), and mouse anti-Flag (1:1000, Sigma). After three washes in PBS, slides were  
654 incubated with indicated secondary antibodies, including goat anti-chicken Alexa Fluor-488  
655 (1:1000, Invitrogen), goat anti-mouse Alexa Fluor-488 (1:1000, Invitrogen), or goat anti-rat Alexa  
656 Fluor-594 (1:1000, Invitrogen), at RT for 60 min. After three washes in PBS, slides were mounted  
657 in ProLong Gold Antifade Mountant (ThermoFisher). Following incorporation of 5-ethynyl-2'-

658 deoxyuridine (EdU) (PMID: 18272492), cells were fixed, permeabilized, and labeled with AF647  
659 azide, according to the Click-iT EdU Imaging Kit protocol (ThermoFisher). Images were acquired  
660 using a confocal microscope (Leica TCS SP8 or Zeiss LSM880).

661

### 662 **Live cell imaging**

663 For time-lapse imaging of E5-mCherry expression in MEFs, cells were seeded on Lab-Tek™ II  
664 chamber slide (ThermoFisher), and infected with MVA-E5R-mCherry at MOI 10 and stained with  
665 fluorogenic SiR-DNA (Cytoskeleton). Cells were incubated at 37°C supplemented with 5% CO<sub>2</sub>.  
666 Images were acquired using a ZEISS Axio Observer Z1. All the images were further processed  
667 with Image J software.

668

### 669 **Plasmid Construction**

670 IFN-β reporter plasmid (pIFN-β-luc) (Wies et al., 2013) was provided by Michaela Gack  
671 (University of Chicago). pRL-TK was purchased from Promega. Human STING expression  
672 plasmid was provided by Tom Maniatis (University of Columbia). Murine STING (mSTING)  
673 sequences were amplified by PCR and were cloned into pcDNA3.2-DEST plasmids. Human cGAS  
674 (hcGAS) and murine cGAS (mcGAS) plasmids were purchased from Invivogen. Flag-cGAS and  
675 V5-cGAS were amplified by PCR and were cloned into pcDNA3.2-DEST plasmids. pRK-HA-  
676 Ubiquitin-WT, pRK-HA-Ubiquitin-K48, and pBabe 12S E1A were purchased from Addgene. 82  
677 selected VACV genes were amplified by PCR from the VACV WR genome and subcloned into  
678 pcDNA3.2-DEST using the Gateway cloning method (Invitrogen).

679

### 680 **The Dual-Luciferase reporter assay**

681 The firefly and *Renilla* luciferase activities were measured using the Dual-Luciferase Reporter  
682 Assay system according to the manufacturer's instructions (Promega). To screen for vaccinia  
683 inhibitors of the cGAS/STING pathway, mcGAS (50 ng) and hSTING (10 ng) expression  
684 plasmids, together with pIFN-β-luc (50 ng), pRL-TK (10 ng), as well as selected vaccinia gene  
685 expression plasmid or adenovirus E1A expression plasmid (200 ng) were transfected into  
686 HEK293T cells. 24 h post-transfection, cells were collected and lysed. To assess the effects of  
687 vaccinia inhibitors of the STING pathway, mSTING (50 ng) expression plasmid, together with  
688 pIFN-β-luc (50 ng), pRL-TK (10 ng), as well as selected vaccinia gene expression constructs or

689 adenovirus E1A expression plasmid (200 ng) were transfected into HEK293T cells. The relative  
690 luciferase activity was expressed as arbitrary units by normalizing firefly luciferase activity under  
691 the IFNB promoter to *Renilla* luciferase activity from a control plasmid, pRL-TK.

692

### 693 **Western blot analysis**

694 Cells were lysed in RIPA lysis buffer supplemented with 1x Halt™ Protease and Phosphatase  
695 Inhibitor Cocktail (ThermoFisher). Protein samples were separated by SDS-PAGE and then  
696 transferred to nitrocellulose membrane and incubated with primary antibodies specific for cGAS  
697 (CST, 31659), His (ThermoFisher, MA1-21315), FLAG (Sigma, F3165), HA (ThermoFisher, 71-  
698 5500), HA (Sigma, H3663), mCherry (ThermoFisher, M11217), and GAPDH (CST, 2118) were  
699 used. HRP-conjugated anti-rabbit, mouse, or rat IgG antibody were used as secondary antibodies  
700 (CST, 7074, 7076 or 7077). Detection was performed using SuperSignal™ Substrates (Thermo  
701 Fisher, 34577 or 34095).

702

### 703 **Co-immunoprecipitation**

704 For cGAS ubiquitination assays, HEK293T cells in 10-cm plates were transfected with V5-cGAS  
705 together with HA-Ub-WT or HA-Ub-K48. 24 h later, cells were infected with MVA or MVAΔE5R  
706 at MOI 10 for 6 h in the presence of MG132 (25 μg/ml) and lysed in RIPA lysis buffer  
707 (ThermoFisher, 89901) on ice for 30 min. Anti-V5 antibody (ThermoFisher, R960-25) was added  
708 into cell lysate to a final concentration of 1 μg/ml and incubated at 4 °C overnight on a rotator.  
709 The next day, protein G-magnetic beads (Bio-Rad, 161-4023) were added and incubated at 4 °C  
710 for 2 h. The beads were washed five times with RIPA buffer. Lastly, the bead-bound proteins were  
711 denatured in SDS buffer by heating at 98 °C for 5 min before loading on an SDS-PAGE gel. E5  
712 ubiquitination assays were performed following a procedure similar to those described above.  
713 Generally, after HEK293T cells were transfected with HA-Ub, they were then infected with  
714 MVAΔE5R or MVAΔE5R-E5R-Fc at MOI 10 for 6 h. After cell lysis with RIPA buffer, protein  
715 A-Agarose beads (ThermoFisher, 20333) were added and incubated at 4 °C for 2 h, washed five  
716 times, and the bead-bound proteins were denatured in SDS buffer by heating at 98 °C for 5 min  
717 before loading on an SDS-PAGE gel.

718

### 719 **Quantitative real-time PCR**

720 Total RNA was extracted from whole cell lysates using TRIzol reagent (Invitrogen) or with  
721 RNeasy Plus Mini kit (Qiagen). RNAs were reverse-transcribed and amplified by PCR using the  
722 Verso cDNA synthesis kit (Thermo Fisher) and SYBR<sup>TM</sup> Green Master Mix (Thermo Fisher).  
723 Cellular RNAs were normalized to GAPDH levels. All assays were performed on an ABI 7500  
724 system and analyzed with ABI 7500 SDS software v.1.3 (Applied Biosystems). Primer sequences  
725 used are listed in Table S1.

726

### 727 **DNA-coupled beads binding assay**

728 Beads coupled to single-end biotinylated DNA were generated as previously described (Postow et  
729 al., 2008). DNA-coupled beads and uncoupled beads were washed twice in binding buffer (10 mM  
730 Tris-Cl pH 7; 80 mM NaCl; 0.05 % Triton X-100; 1 mM DTT). <sup>35</sup>S methionine-labeled full-length  
731 cGAS and E5 was generated with the TnT Coupled Reticulocyte Lysate System (Promega)  
732 according to the manufacturer's instructions. TnT reactions without added template DNA served  
733 as control. TnT reactions were diluted 1:10 in binding buffer supplemented with BSA to a final  
734 concentration of 0.04 µg/µl, and beads coupled to 1 µg of DNA were incubated in 20 µl of this  
735 mixture at 20 °C for 45 min under agitation. Beads were then washed three times in binding buffer,  
736 and bound proteins were eluted with SDS sample buffer, and analyzed by gel electrophoresis,  
737 followed by scanning on a phosphoimager of the dried gel.

738

### 739 **cGAMP measurement by liquid chromatography-mass spectrometry (LC-MS).**

740 cGAMP was measured by LC-MS as previously reported (Li et al., 2021). Briefly, cell pellets  
741 were supplemented with 80 fmol internal standard (<sup>15</sup>N<sub>10</sub>-cGAMP, in-house generated) and were  
742 extracted subsequently in 80% methanol and 2% acetic acid, and twice in 2% acetic acid to  
743 obtain metabolite extract. cGAMP was enriched from combined extracts on HyperSep  
744 Aminopropyl SPE Columns (Thermo Scientific). After washing twice in 2% acetic acid and once  
745 in 80% methanol, samples were eluted in 4% ammonium hydroxide in 80% methanol. Vacuum-  
746 dried eluents were dissolved in water and analyzed on a Dionex U3000 HPLC coupled with TSQ  
747 Quantiva Triple Quadruple mass spectrometer (Thermo Scientific). The chromatography used  
748 LUNA NH<sub>2</sub> resin (5 µm, Phenomenex) as stationary phase packed in 0.1 mm ID × 70 mm L  
749 silica capillaries. Mobile phases are acetonitrile (A), and 20 mM ammonium bicarbonate and 20  
750 mM ammonium hydroxide aqueous solution (B). Flow rate is 800 nL/min (0-4 min), 300 nL/min

751 (4-19 min), and 600 nL/min (19-27 min), with a gradient of 20% B (0-3 min), 50% B (4 min),  
752 80% B (14-18 min), and 20% B (19-27 min). cGAMP and standard were analyzed by multiple  
753 reaction monitoring in the positive mode with the following transitions: 675-136, 675-152, 675-  
754 476, and 675-524 for cGAMP; and 685-136, 685-157, 685-480, and 685-529 for the <sup>15</sup>N<sub>10</sub>-  
755 cGAMP standard. Endogenous cGAMP levels were calculated by multiplying the cGAMP-to-  
756 standard ratios by 80 fmol (the amount of standard spiked into each sample).

757

### 758 **Detection of ubiquitinated vaccinia viral proteins by LC-MS.**

759 To detect ubiquitinated viral protein during vaccinia virus infection, HEK293T cells were infected  
760 with MVA at MOI 10 for 6 h in the presence of MG132. Ubiquitinated proteins were purified  
761 using Halo-4× UBA<sup>UBQLN1</sup> as previously described (Ordureau et al., 2014). Briefly, whole-cell  
762 extracts (1 mg) that were lysed in lysis buffer containing 100 mM chloroacetamide and incubated  
763 at 4 °C for 16 h with 30 μL of Halo-4× UBA<sup>UBQLN1</sup> beads (pack volume). Following four washes  
764 with lysis buffer containing 1 M NaCl, and one final wash in 10 mM Tris (pH 8.0), proteins were  
765 released from Halo-4× UBA<sup>UBQLN1</sup> beads by 6 M guanidine HCL.

766

767 For MS, the released proteins were purified by SP3 protocol and digested with 20 μl of trypsin  
768 (20 ng/μl) and lysC (10 ng/μl) on beads at 37°C for 2 hours followed by incubation at 24°C  
769 overnight. After de-salting, samples were subjected to reduction (10 mM TCEP) and alkylation  
770 (20 mM chloroacetamide). After digested overnight at 37 °C with trypsin, and further purified  
771 with SP3 protocol (BD Biosciences), samples were analyzed by LC/ MS(Waters nanoAcquity  
772 UHPLC/Thermo QExactuve Plus).

773

774 The LC-MS/MS .raw files were processed using Mascot (version 2.6.1.100) and searched for  
775 protein identification against the SwissProt protein database for human (downloaded January 7<sup>th</sup>,  
776 2020) and vaccinia virus (downloaded September 17<sup>th</sup>, 2021). Carbamidomethylation of C was  
777 set as a fixed modification and the following variable modifications allowed: oxidation (M), N-  
778 terminal protein acetylation, deamidation (N and Q), ubiquitination (K), and phosphorylation (S,  
779 T and Y). Search parameters specified an MS tolerance of 10 ppm, an MS/MS tolerance at 0.080  
780 Da and full trypsin digestion, allowing for up to two missed cleavages. False discovery rate was



781 restricted to 1% in both protein and peptide level. Protein coverage and peptide count were  
782 obtained using Scaffold (4.8.4).

783

#### 784 **RNA-seq analyses of GM-CSF-cultured BMDCs infected with MVA vs. MVA $\Delta$ E5R**

785 GM-CSF-cultured BMDCs ( $1 \times 10^6$ ) from WT or cGAS<sup>-/-</sup> mice were infected with MVA or  
786 MVA $\Delta$ E5R at a multiplicity of infection (MOI) of 10. Cells were collected at 16 h post-infection.  
787 Total RNA was extracted from collected cells using RNeasy Plus Mini kit (Qiagen) according to  
788 manufacturer's protocol. Total RNA integrity was analyzed using a 2100 Bioanalyzer (Agilent  
789 Technologies). Messenger RNA was prepared using TruSeq Stranded mRNA Sample Library  
790 Preparation kit (Illumina, San Diego, CA) according to the manufacturer's instructions. The  
791 normalized final cDNA libraries were pooled and sequenced on Illumina NovaSeq6000 sequencer  
792 with pair-end 50 cycles. The raw sequencing reads in BCL format were processed through  
793 bcl2fastq 2.19 (Illumina) for FASTQ conversion and demultiplexing.

794

795 The resulting FASTQ files were processed using kallisto (PMID: 27043002) followed by a  
796 tximport (PMID: 26925227) transcript-to-gene level transformation. Transcript indices for kallisto  
797 were created using FASTA files from Ensembl release 95 for mm10 for all annotated cDNA and  
798 ncRNA transcripts, as well as FASTA sequences for WT VACV transcripts (accession no.  
799 NC\_006998.1). Gene-level read counts were then processed using the limma suite of tools (PMID:  
800 **25605792**) first with a voom transformation, followed by linear model fitting to determine  
801 differentially expressed genes, and lastly performing gene set testing using the CAMERA function.  
802 Select gene sets were plotted as row normalized z-scores in heatmaps using voom normalized  
803 counts.

804

#### 805 **Statistics**

806 Two-tailed unpaired Student's t test was used for comparisons of two groups in the studies.  
807 Survival data were analyzed by log-rank (Mantel-Cox) test. The p values deemed significant are  
808 indicated in the figures as follows: \*,  $p < 0.05$ ; \*\*,  $p < 0.01$ ; \*\*\*,  $p < 0.001$ ; \*\*\*\*,  $p < 0.0001$ . The  
809 numbers of animals included in the study are discussed in each figure legend.

810 **REFERENCES**

- 811 Abhiman, S., Iyer, L.M., and Aravind, L. (2008). BEN: a novel domain in chromatin factors  
812 and DNA viral proteins. *Bioinformatics* *24*, 458-461.  
813
- 814 Ablasser, A., and Chen, Z.J. (2019). cGAS in action: Expanding roles in immunity and  
815 inflammation. *Science* *363*.  
816
- 817 Ahn, B.Y., Gershon, P.D., Jones, E.V., and Moss, B. (1990). Identification of rpo30, a vaccinia  
818 virus RNA polymerase gene with structural similarity to a eucaryotic transcription  
819 elongation factor. *Mol Cell Biol* *10*, 5433-5441.  
820
- 821 Antoine, G., Scheiflinger, F., Dorner, F., and Falkner, F.G. (1998). The complete genomic  
822 sequence of the modified vaccinia Ankara strain: comparison with other orthopoxviruses.  
823 *Virology* *244*, 365-396.  
824
- 825 Benfield, C.T., Ren, H., Lucas, S.J., Bahsoun, B., and Smith, G.L. (2013). Vaccinia virus protein  
826 K7 is a virulence factor that alters the acute immune response to infection. *J Gen Virol* *94*,  
827 1647-1657.  
828
- 829 Boyer, J.A., Spangler, C.J., Strauss, J.D., Cesmat, A.P., Liu, P., McGinty, R.K., and Zhang, Q.  
830 (2020). Structural basis of nucleosome-dependent cGAS inhibition. *Science* *370*, 450-454.  
831
- 832 Chen, M., Meng, Q., Qin, Y., Liang, P., Tan, P., He, L., Zhou, Y., Chen, Y., Huang, J., Wang, R.F., *et*  
833 *al.* (2016). TRIM14 Inhibits cGAS Degradation Mediated by Selective Autophagy Receptor  
834 p62 to Promote Innate Immune Responses. *Mol Cell* *64*, 105-119.  
835
- 836 Chen, R.A., Ryzhakov, G., Cooray, S., Randow, F., and Smith, G.L. (2008). Inhibition of  
837 IkappaB kinase by vaccinia virus virulence factor B14. *PLoS Pathog* *4*, e22.  
838
- 839 Dai, P., Cao, H., Merghoub, T., Avogadri, F., Wang, W., Parikh, T., Fang, C.M., Pitha, P.M.,  
840 Fitzgerald, K.A., Rahman, M.M., *et al.* (2011). Myxoma virus induces type I interferon  
841 production in murine plasmacytoid dendritic cells via a TLR9/MyD88-, IRF5/IRF7-, and  
842 IFNAR-dependent pathway. *J Virol* *85*, 10814-10825.  
843
- 844 Dai, P., Wang, W., Cao, H., Avogadri, F., Dai, L., Drexler, I., Joyce, J.A., Li, X.D., Chen, Z.,  
845 Merghoub, T., *et al.* (2014). Modified vaccinia virus Ankara triggers type I IFN production in  
846 murine conventional dendritic cells via a cGAS/STING-mediated cytosolic DNA-sensing  
847 pathway. *PLoS Pathog* *10*, e1003989.  
848
- 849 Dai, P., Wang, W., Yang, N., Serna-Tamayo, C., Ricca, J.M., Zamarin, D., Shuman, S., Merghoub,  
850 T., Wolchok, J.D., and Deng, L. (2017). Intratumoral delivery of inactivated modified  
851 vaccinia virus Ankara (iMVA) induces systemic antitumor immunity via STING and Batf3-  
852 dependent dendritic cells. *Sci Immunol* *2*.



- 853 Dai, Q., Ren, A., Westholm, J.O., Serganov, A.A., Patel, D.J., and Lai, E.C. (2013). The BEN  
854 domain is a novel sequence-specific DNA-binding domain conserved in neural  
855 transcriptional repressors. *Genes Dev* 27, 602-614.  
856
- 857 DeFilippes, F.M. (1984). Effect of aphidicolin on vaccinia virus: isolation of an aphidicolin-  
858 resistant mutant. *J Virol* 52, 474-482.  
859
- 860 Deng, L., Dai, P., Ding, W., Granstein, R.D., and Shuman, S. (2006). Vaccinia virus infection  
861 attenuates innate immune responses and antigen presentation by epidermal dendritic cells.  
862 *J Virol* 80, 9977-9987.  
863
- 864 Deng, L., Dai, P., Parikh, T., Cao, H., Bhoj, V., Sun, Q., Chen, Z., Merghoub, T., Houghton, A., and  
865 Shuman, S. (2008). Vaccinia virus subverts a mitochondrial antiviral signaling protein-  
866 dependent innate immune response in keratinocytes through its double-stranded RNA  
867 binding protein, E3. *J Virol* 82, 10735-10746.  
868
- 869 Douglas, N.J., and Dumbell, K.R. (1996). DNA sequence variation as a clue to the  
870 phylogenesis of orthopoxviruses. *J Gen Virol* 77 ( Pt 5), 947-951.  
871
- 872 Drillien, R., Spehner, D., and Hanau, D. (2004). Modified vaccinia virus Ankara induces  
873 moderate activation of human dendritic cells. *J Gen Virol* 85, 2167-2175.  
874
- 875 Eaglesham, J.B., Pan, Y., Kupper, T.S., and Kranzusch, P.J. (2019). Viral and metazoan poxins  
876 are cGAMP-specific nucleases that restrict cGAS-STING signalling. *Nature* 566, 259-263.  
877
- 878 Engelmayer, J., Larsson, M., Subklewe, M., Chahroudi, A., Cox, W.I., Steinman, R.M., and  
879 Bhardwaj, N. (1999). Vaccinia virus inhibits the maturation of human dendritic cells: a  
880 novel mechanism of immune evasion. *J Immunol* 163, 6762-6768.  
881
- 882 Fedotova, A., Clendinen, C., Bonchuk, A., Mogila, V., Aoki, T., Georgiev, P., and Schedl, P.  
883 (2019). Functional dissection of the developmentally restricted BEN domain chromatin  
884 boundary factor Insensitive. *Epigenetics Chromatin* 12, 2.  
885
- 886 Garcia-Arriaza, J., Garaigorta, U., Perez, P., Lazaro-Frias, A., Zamora, C., Gastaminza, P., Del  
887 Fresno, C., Casasnovas, J.M., Sorzano, C.O.S., Sancho, D., *et al.* (2021). COVID-19 vaccine  
888 candidates based on modified vaccinia virus Ankara expressing the SARS-CoV-2 spike  
889 induce robust T- and B-cell immune responses and full efficacy in mice. *J Virol*.  
890
- 891 Georgana, I., Sumner, R.P., Towers, G.J., and Maluquer de Motes, C. (2018). Virulent  
892 Poxviruses Inhibit DNA Sensing by Preventing STING Activation. *J Virol* 92.  
893
- 894 Gitlin, L., Barchet, W., Gilfillan, S., Cella, M., Beutler, B., Flavell, R.A., Diamond, M.S., and  
895 Colonna, M. (2006). Essential role of mda-5 in type I IFN responses to  
896 polyriboinosinic:polyribocytidylic acid and encephalomyocarditis picornavirus. *Proc Natl*  
897 *Acad Sci U S A* 103, 8459-8464.

- 898 Jenne, L., Hauser, C., Arrighi, J.F., Saurat, J.H., and Hugin, A.W. (2000). Poxvirus as a vector to  
899 transduce human dendritic cells for immunotherapy: abortive infection but reduced APC  
900 function. *Gene therapy* 7, 1575-1583.  
901
- 902 Kujirai, T., Zierhut, C., Takizawa, Y., Kim, R., Negishi, L., Uruma, N., Hirai, S., Funabiki, H., and  
903 Kurumizaka, H. (2020). Structural basis for the inhibition of cGAS by nucleosomes. *Science*  
904 370, 455-458.  
905
- 906 Lau, L., Gray, E.E., Brunette, R.L., and Stetson, D.B. (2015). DNA tumor virus oncogenes  
907 antagonize the cGAS-STING DNA-sensing pathway. *Science* 350, 568-571.  
908
- 909 Li, T., Huang, T., Du, M., Chen, X., Du, F., Ren, J., and Chen, Z.J. (2021). Phosphorylation and  
910 chromatin tethering prevent cGAS activation during mitosis. *Science* 371.  
911
- 912 Li, X.D., Wu, J., Gao, D., Wang, H., Sun, L., and Chen, Z.J. (2013). Pivotal roles of cGAS-cGAMP  
913 signaling in antiviral defense and immune adjuvant effects. *Science* 341, 1390-1394.  
914
- 915 Liu, B., Panda, D., Mendez-Rios, J.D., Ganesan, S., Wyatt, L.S., and Moss, B. (2018).  
916 Identification of Poxvirus Genome Uncoating and DNA Replication Factors with Mutually  
917 Redundant Roles. *J Virol* 92.  
918
- 919 Liu, R., Americo, J.L., Cotter, C.A., Earl, P.L., Erez, N., Peng, C., and Moss, B. (2021). One or two  
920 injections of MVA-vectored vaccine shields hACE2 transgenic mice from SARS-CoV-2 upper  
921 and lower respiratory tract infection. *Proc Natl Acad Sci U S A* 118.  
922
- 923 Ma, Z., and Damania, B. (2016). The cGAS-STING Defense Pathway and Its Counteraction by  
924 Viruses. *Cell Host Microbe* 19, 150-158.  
925
- 926 Martin, S., Harris, D.T., and Shisler, J. (2012). The C11R gene, which encodes the vaccinia  
927 virus growth factor, is partially responsible for MVA-induced NF-kappaB and ERK2  
928 activation. *J Virol* 86, 9629-9639.  
929
- 930 Mercer, J., and Helenius, A. (2008). Vaccinia virus uses macropinocytosis and apoptotic  
931 mimicry to enter host cells. *Science* 320, 531-535.  
932
- 933 Mirzakhanyan, Y., and Gershon, P. (2019). The Vaccinia virion: Filling the gap between  
934 atomic and ultrastructure. *PLoS Pathog* 15, e1007508.  
935
- 936 Moss, B., and Cooper, N. (1982). Genetic evidence for vaccinia virus-encoded DNA  
937 polymerase: isolation of phosphonoacetate-resistant enzyme from the cytoplasm of cells  
938 infected with mutant virus. *J Virol* 43, 673-678.  
939
- 940 Murcia-Nicolas, A., Bolbach, G., Blais, J.C., and Beaud, G. (1999). Identification by mass  
941 spectroscopy of three major early proteins associated with virosomes in vaccinia virus-  
942 infected cells. *Virus Res* 59, 1-12.

- 943 Ordureau, A., Sarraf, S.A., Duda, D.M., Heo, J.M., Jedrychowski, M.P., Sviderskiy, V.O.,  
944 Olszewski, J.L., Koerber, J.T., Xie, T., Beausoleil, S.A., *et al.* (2014). Quantitative proteomics  
945 reveal a feedforward mechanism for mitochondrial PARKIN translocation and ubiquitin  
946 chain synthesis. *Mol Cell* *56*, 360-375.
- 947  
948 Pittman, P.R., Hahn, M., Lee, H.S., Koca, C., Samy, N., Schmidt, D., Hornung, J., Weidenthaler,  
949 H., Heery, C.R., Meyer, T.P.H., *et al.* (2019). Phase 3 Efficacy Trial of Modified Vaccinia  
950 Ankara as a Vaccine against Smallpox. *N Engl J Med* *381*, 1897-1908.
- 951  
952 Postow, L., Ghenoiu, C., Woo, E.M., Krutchinsky, A.N., Chait, B.T., and Funabiki, H. (2008).  
953 Ku80 removal from DNA through double strand break-induced ubiquitylation. *J Cell Biol*  
954 *182*, 467-479.
- 955  
956 Rosales, R., Harris, N., Ahn, B.Y., and Moss, B. (1994). Purification and identification of a  
957 vaccinia virus-encoded intermediate stage promoter-specific transcription factor that has  
958 homology to eukaryotic transcription factor SII (TFIIS) and an additional role as a viral  
959 RNA polymerase subunit. *J Biol Chem* *269*, 14260-14267.
- 960  
961 Routhu, N.K., Cheedarla, N., Gangadhara, S., Bollimpelli, V.S., Boddapati, A.K., Shiferaw, A.,  
962 Rahman, S.A., Sahoo, A., Edara, V.V., Lai, L., *et al.* (2021). A modified vaccinia Ankara vector-  
963 based vaccine protects macaques from SARS-CoV-2 infection, immune pathology, and  
964 dysfunction in the lungs. *Immunity* *54*, 542-556 e549.
- 965  
966 Sathyan, K.M., Shen, Z., Tripathi, V., Prasanth, K.V., and Prasanth, S.G. (2011). A BEN-  
967 domain-containing protein associates with heterochromatin and represses transcription. *J*  
968 *Cell Sci* *124*, 3149-3163.
- 969  
970 Sauer, J.D., Sotelo-Troha, K., von Moltke, J., Monroe, K.M., Rae, C.S., Brubaker, S.W., Hyodo,  
971 M., Hayakawa, Y., Woodward, J.J., Portnoy, D.A., *et al.* (2011). The N-ethyl-N-nitrosourea-  
972 induced Goldenticket mouse mutant reveals an essential function of Sting in the in vivo  
973 interferon response to *Listeria monocytogenes* and cyclic dinucleotides. *Infect Immun* *79*,  
974 688-694.
- 975  
976 Schoggins, J.W., MacDuff, D.A., Imanaka, N., Gainey, M.D., Shrestha, B., Eitson, J.L., Mar, K.B.,  
977 Richardson, R.B., Ratushny, A.V., Litvak, V., *et al.* (2014). Pan-viral specificity of IFN-induced  
978 genes reveals new roles for cGAS in innate immunity. *Nature* *505*, 691-695.
- 979  
980 Seo, G.J., Kim, C., Shin, W.J., Sklan, E.H., Eoh, H., and Jung, J.U. (2018). TRIM56-mediated  
981 monoubiquitination of cGAS for cytosolic DNA sensing. *Nat Commun* *9*, 613.
- 982  
983 Song, B., Greco, T.M., Lum, K.K., Taber, C.E., and Cristea, I.M. (2020). The DNA Sensor cGAS is  
984 Decorated by Acetylation and Phosphorylation Modifications in the Context of Immune  
985 Signaling. *Mol Cell Proteomics* *19*, 1193-1208.
- 986  
987 Sperling, K.M., Schwantes, A., Staib, C., Schnierle, B.S., and Sutter, G. (2009). The  
988 orthopoxvirus 68-kilodalton ankyrin-like protein is essential for DNA replication and

989 complete gene expression of modified vaccinia virus Ankara in nonpermissive human and  
990 murine cells. *J Virol* *83*, 6029-6038.  
991  
992 Sutter, G., and Moss, B. (1992). Nonreplicating vaccinia vector efficiently expresses  
993 recombinant genes. *Proc Natl Acad Sci U S A* *89*, 10847-10851.  
994  
995 Symons, J.A., Alcami, A., and Smith, G.L. (1995). Vaccinia virus encodes a soluble type I  
996 interferon receptor of novel structure and broad species specificity. *Cell* *81*, 551-560.  
997  
998 Tscherne, A., Schwarz, J.H., Rohde, C., Kupke, A., Kalodimou, G., Limpinsel, L., Okba, N.M.A.,  
999 Bosnjak, B., Sandrock, I., Odak, I., *et al.* (2021). Immunogenicity and efficacy of the COVID-  
1000 19 candidate vector vaccine MVA-SARS-2-S in preclinical vaccination. *Proc Natl Acad Sci U*  
1001 *S A* *118*.  
1002  
1003 Volz, A., and Sutter, G. (2017). Modified Vaccinia Virus Ankara: History, Value in Basic  
1004 Research, and Current Perspectives for Vaccine Development. *Adv Virus Res* *97*, 187-243.  
1005  
1006 Wang, Q., Huang, L., Hong, Z., Lv, Z., Mao, Z., Tang, Y., Kong, X., Li, S., Cui, Y., Liu, H., *et al.*  
1007 (2017). The E3 ubiquitin ligase RNF185 facilitates the cGAS-mediated innate immune  
1008 response. *PLoS Pathog* *13*, e1006264.  
1009  
1010 Wies, E., Wang, M.K., Maharaj, N.P., Chen, K., Zhou, S., Finberg, R.W., and Gack, M.U. (2013).  
1011 Dephosphorylation of the RNA sensors RIG-I and MDA5 by the phosphatase PP1 is essential  
1012 for innate immune signaling. *Immunity* *38*, 437-449.  
1013  
1014 Wong, E.B., Montoya, B., Ferez, M., Stotesbury, C., and Sigal, L.J. (2019). Resistance to  
1015 ectromelia virus infection requires cGAS in bone marrow-derived cells which can be  
1016 bypassed with cGAMP therapy. *PLoS Pathog* *15*, e1008239.  
1017  
1018 Wu, J., Sun, L., Chen, X., Du, F., Shi, H., Chen, C., and Chen, Z.J. (2013). Cyclic GMP-AMP is an  
1019 endogenous second messenger in innate immune signaling by cytosolic DNA. *Science* *339*,  
1020 826-830.  
1021  
1022 Wu, J.J., Li, W., Shao, Y., Avey, D., Fu, B., Gillen, J., Hand, T., Ma, S., Liu, X., Miley, W., *et al.*  
1023 (2015). Inhibition of cGAS DNA Sensing by a Herpesvirus Virion Protein. *Cell host &*  
1024 *microbe* *18*, 333-344.  
1025  
1026 Wu, Y., and Li, S. (2020). Role of Post-Translational Modifications of cGAS in Innate  
1027 Immunity. *Int J Mol Sci* *21*.  
1028  
1029 Yang, H., Wang, H., Ren, J., Chen, Q., and Chen, Z.J. (2017). cGAS is essential for cellular  
1030 senescence. *Proc Natl Acad Sci U S A* *114*, E4612-E4620.  
1031  
1032 Yang, Z., Bruno, D.P., Martens, C.A., Porcella, S.F., and Moss, B. (2010). Simultaneous high-  
1033 resolution analysis of vaccinia virus and host cell transcriptomes by deep RNA sequencing.  
1034 *Proc Natl Acad Sci U S A* *107*, 11513-11518.

1035 Zhang, G., Chan, B., Samarina, N., Abere, B., Weidner-Glunde, M., Buch, A., Pich, A.,  
1036 Brinkmann, M.M., and Schulz, T.F. (2016). Cytoplasmic isoforms of Kaposi sarcoma  
1037 herpesvirus LANA recruit and antagonize the innate immune DNA sensor cGAS. *Proc Natl*  
1038 *Acad Sci U S A* *113*, E1034-1043.  
1039
